# Supplementary material for: Screening of a kinase inhibitor library identified novel targetable kinase pathways in triple-negative breast cancer
Source: PubMed Central journal article supplement — Anticancer Drugs. 2024 Aug 21;36(1):39–48. doi: 10.1097/CAD.0000000000001658 (PMC11634125; doi:10.1097/cad.0000000000001658), 2024-08-21

Supplemental Digital Content 1: Crystal violet stained 4IC cells after treatment with the entire KCGS library for 72 hours imaged at 4x (A) and 20x (B) magnifications.

A

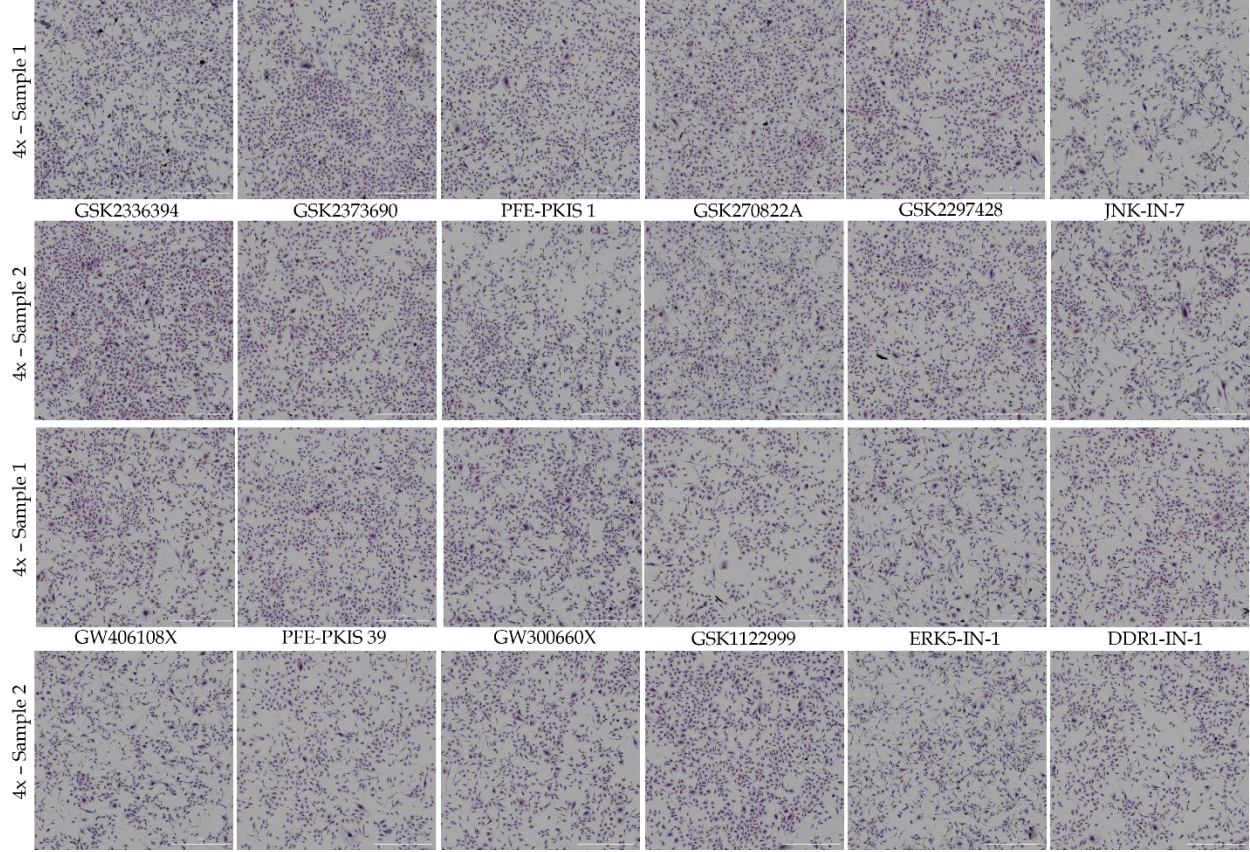

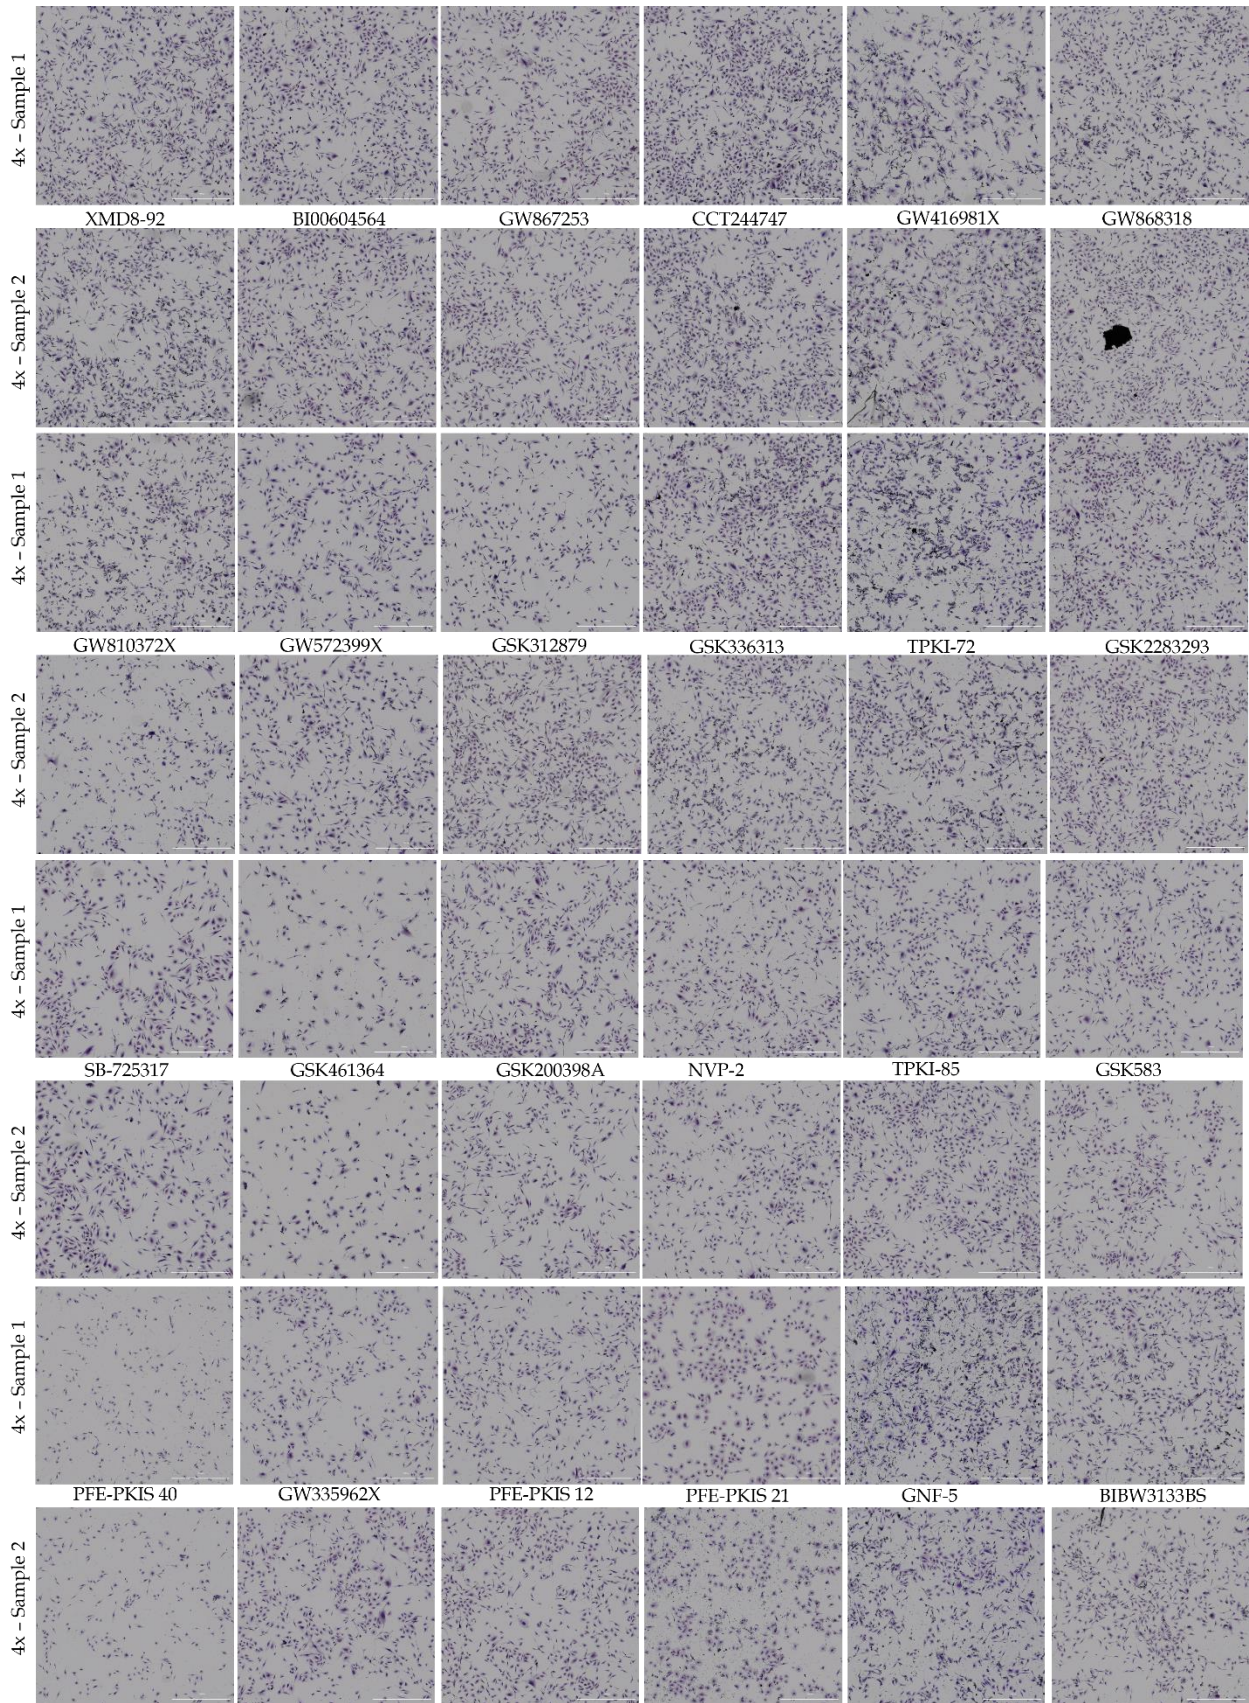

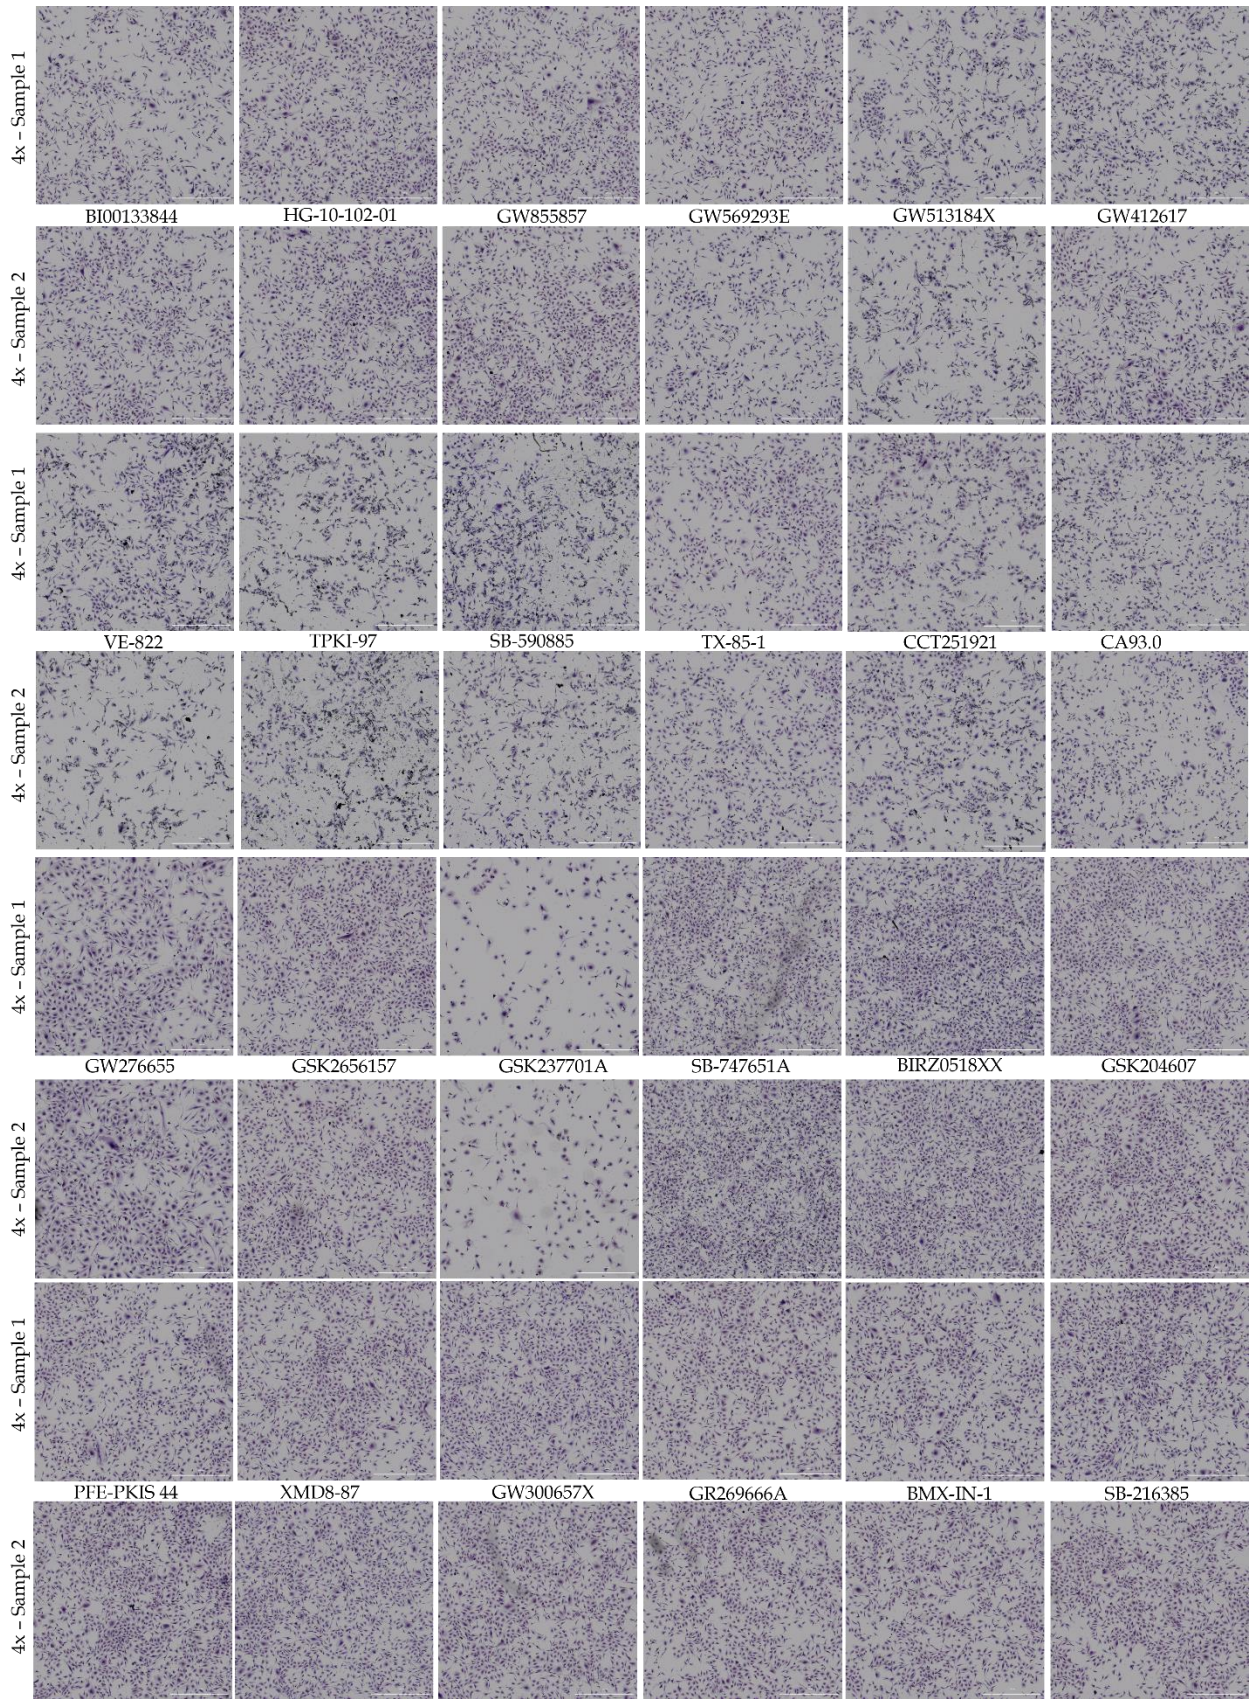

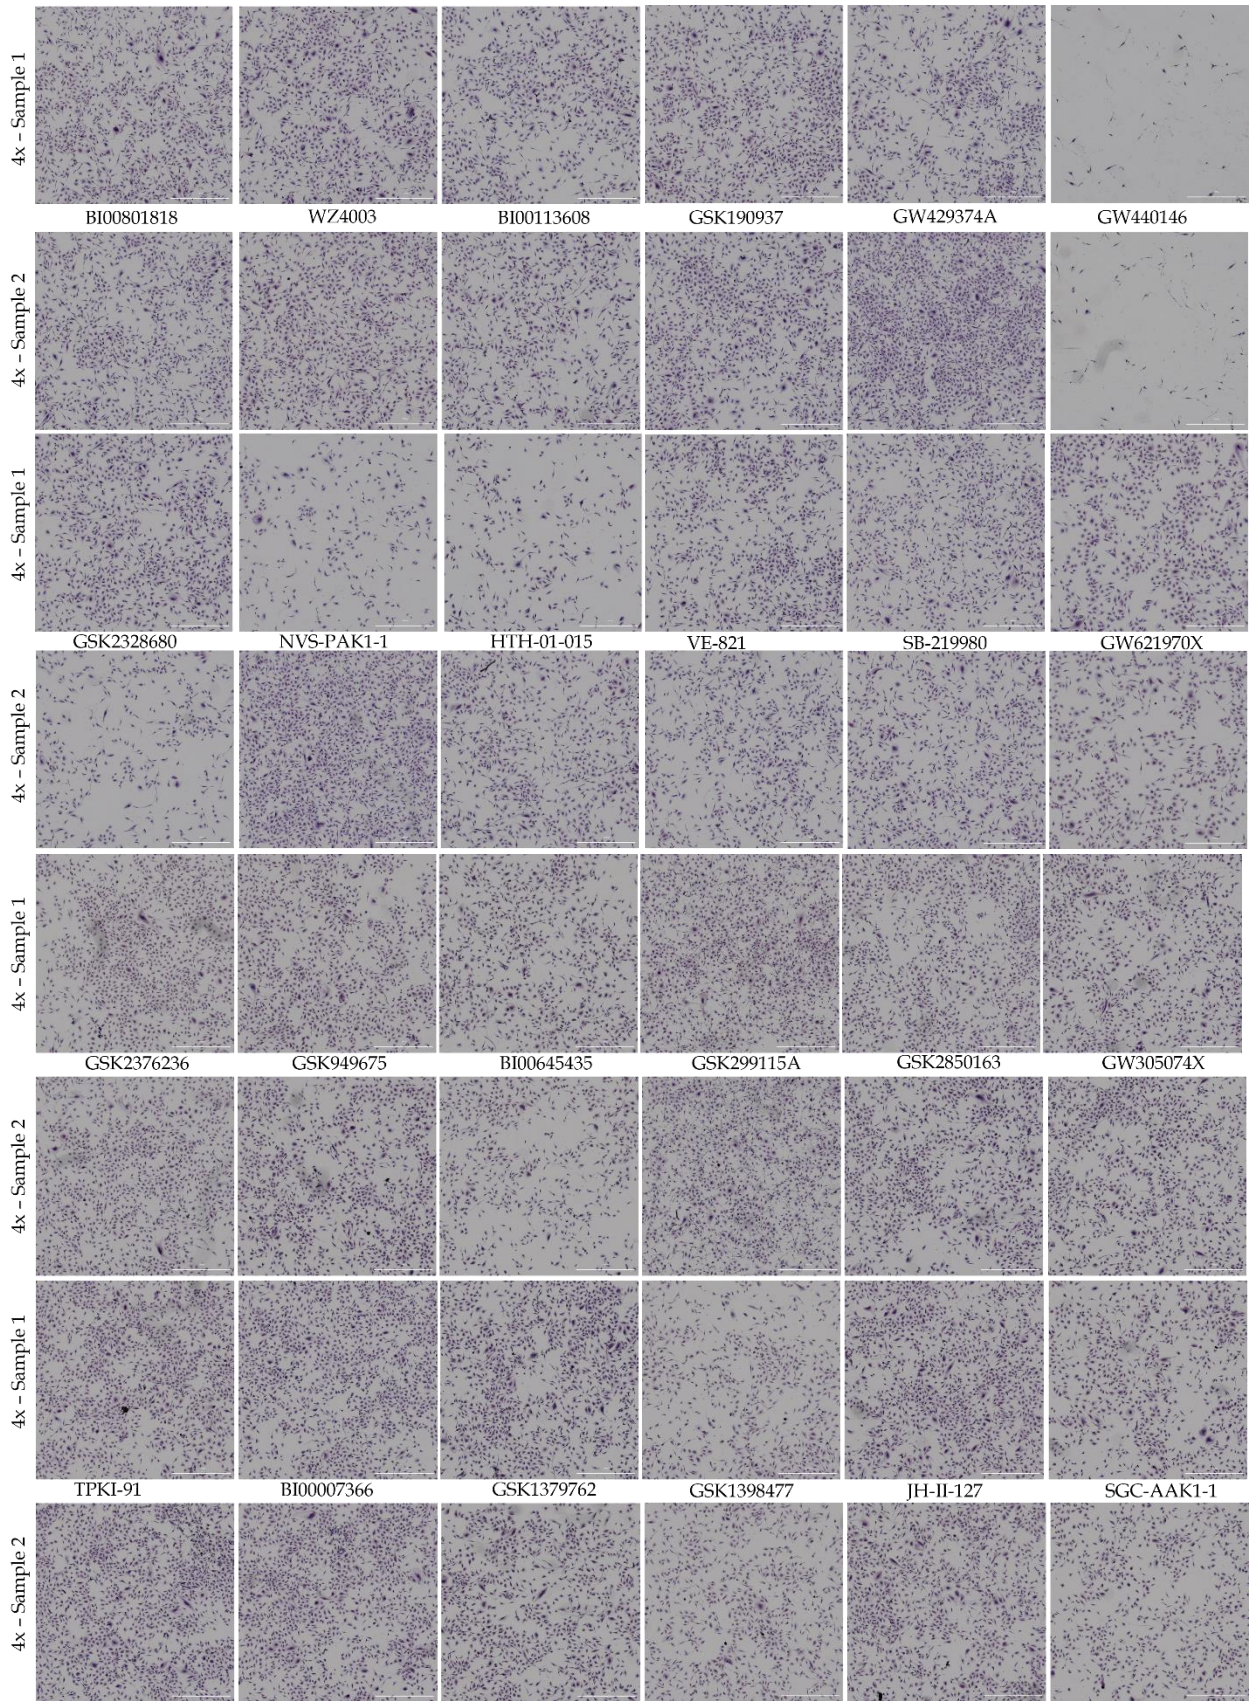

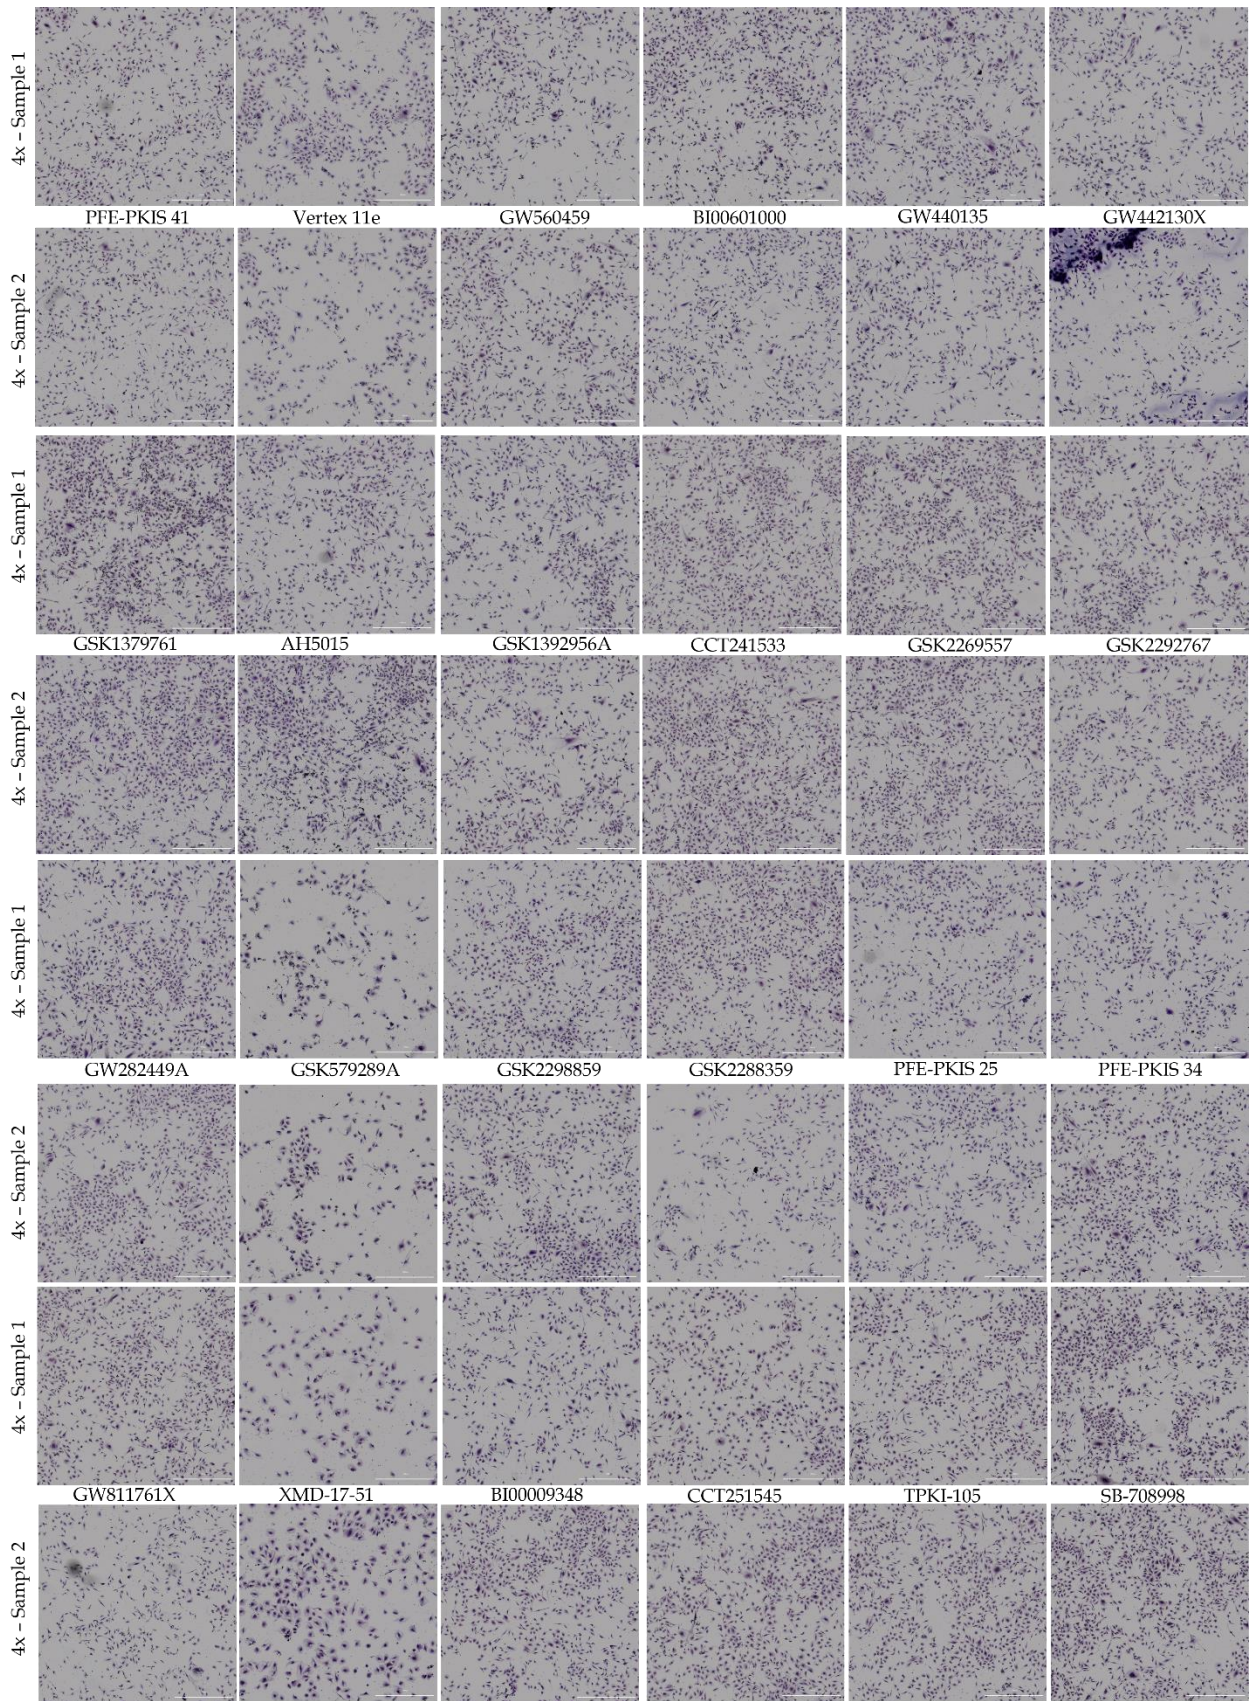

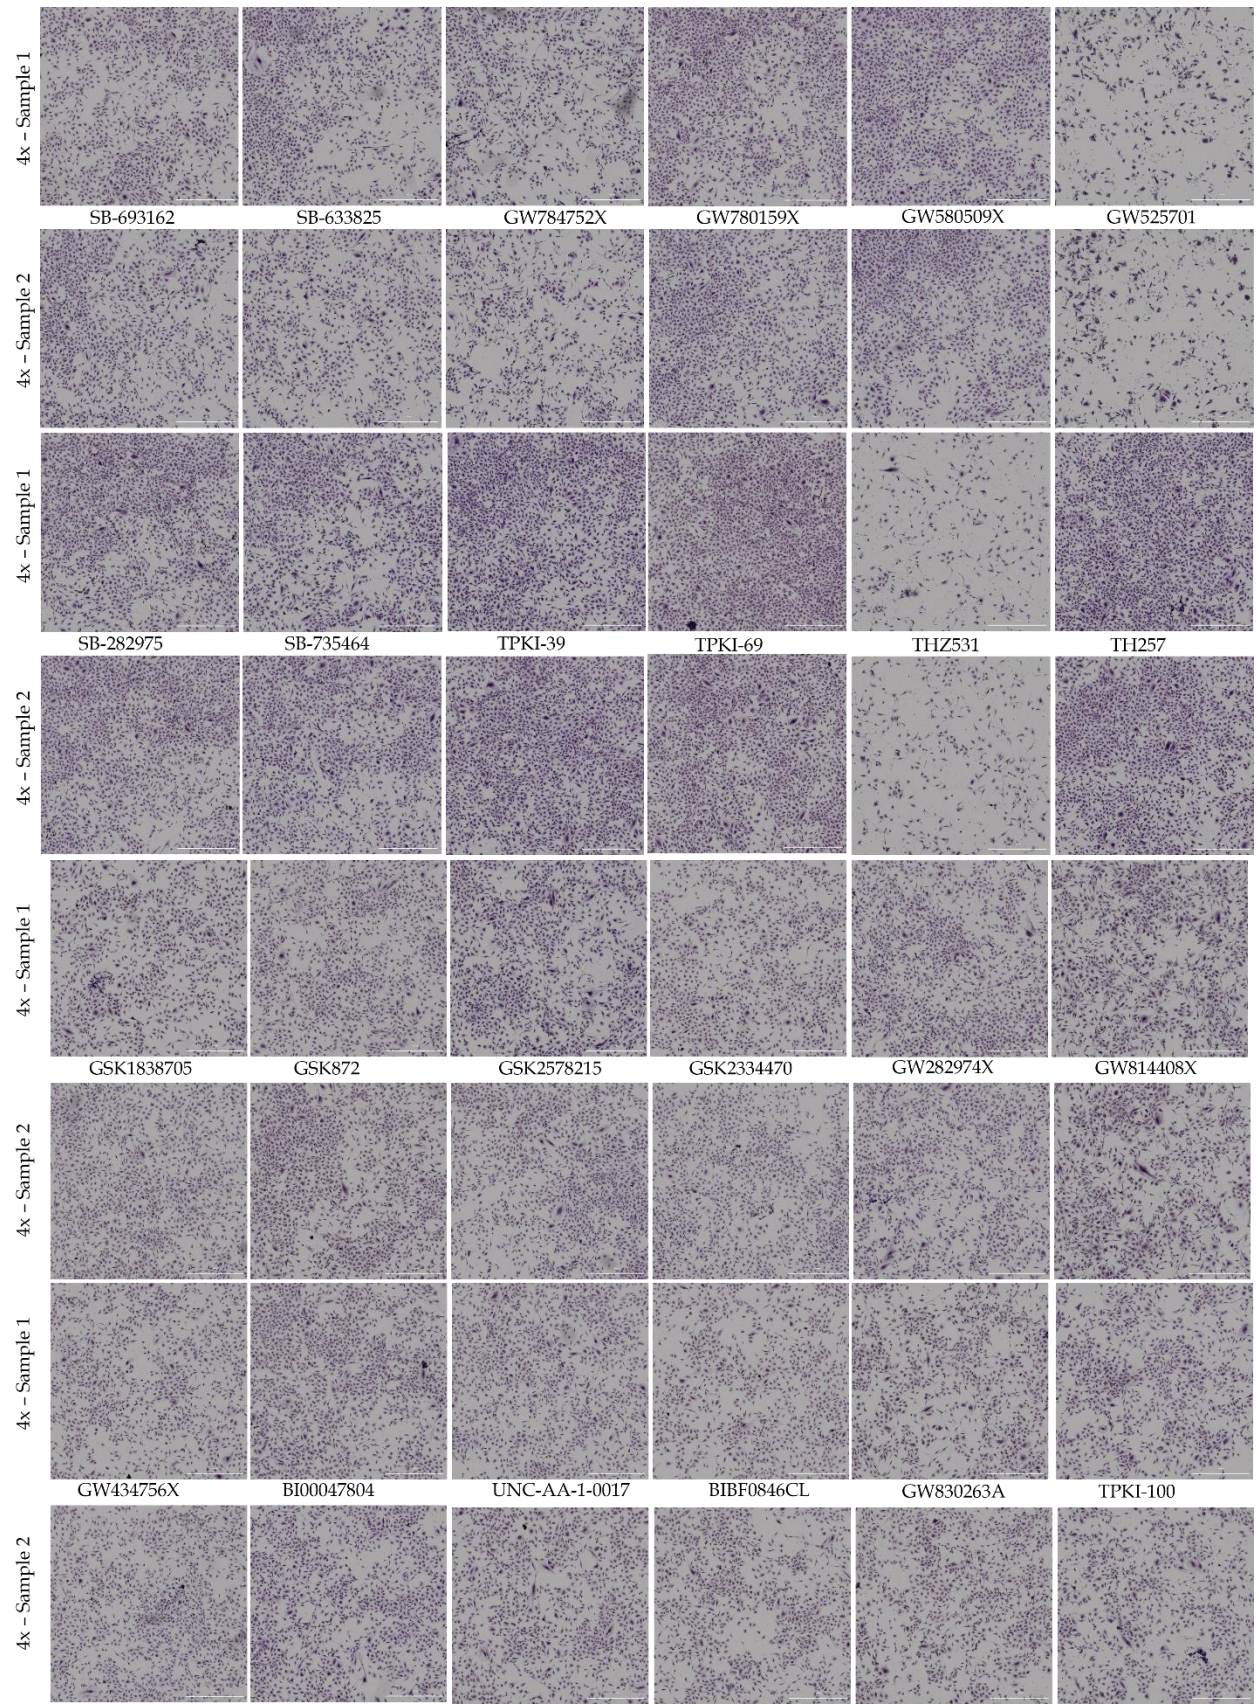

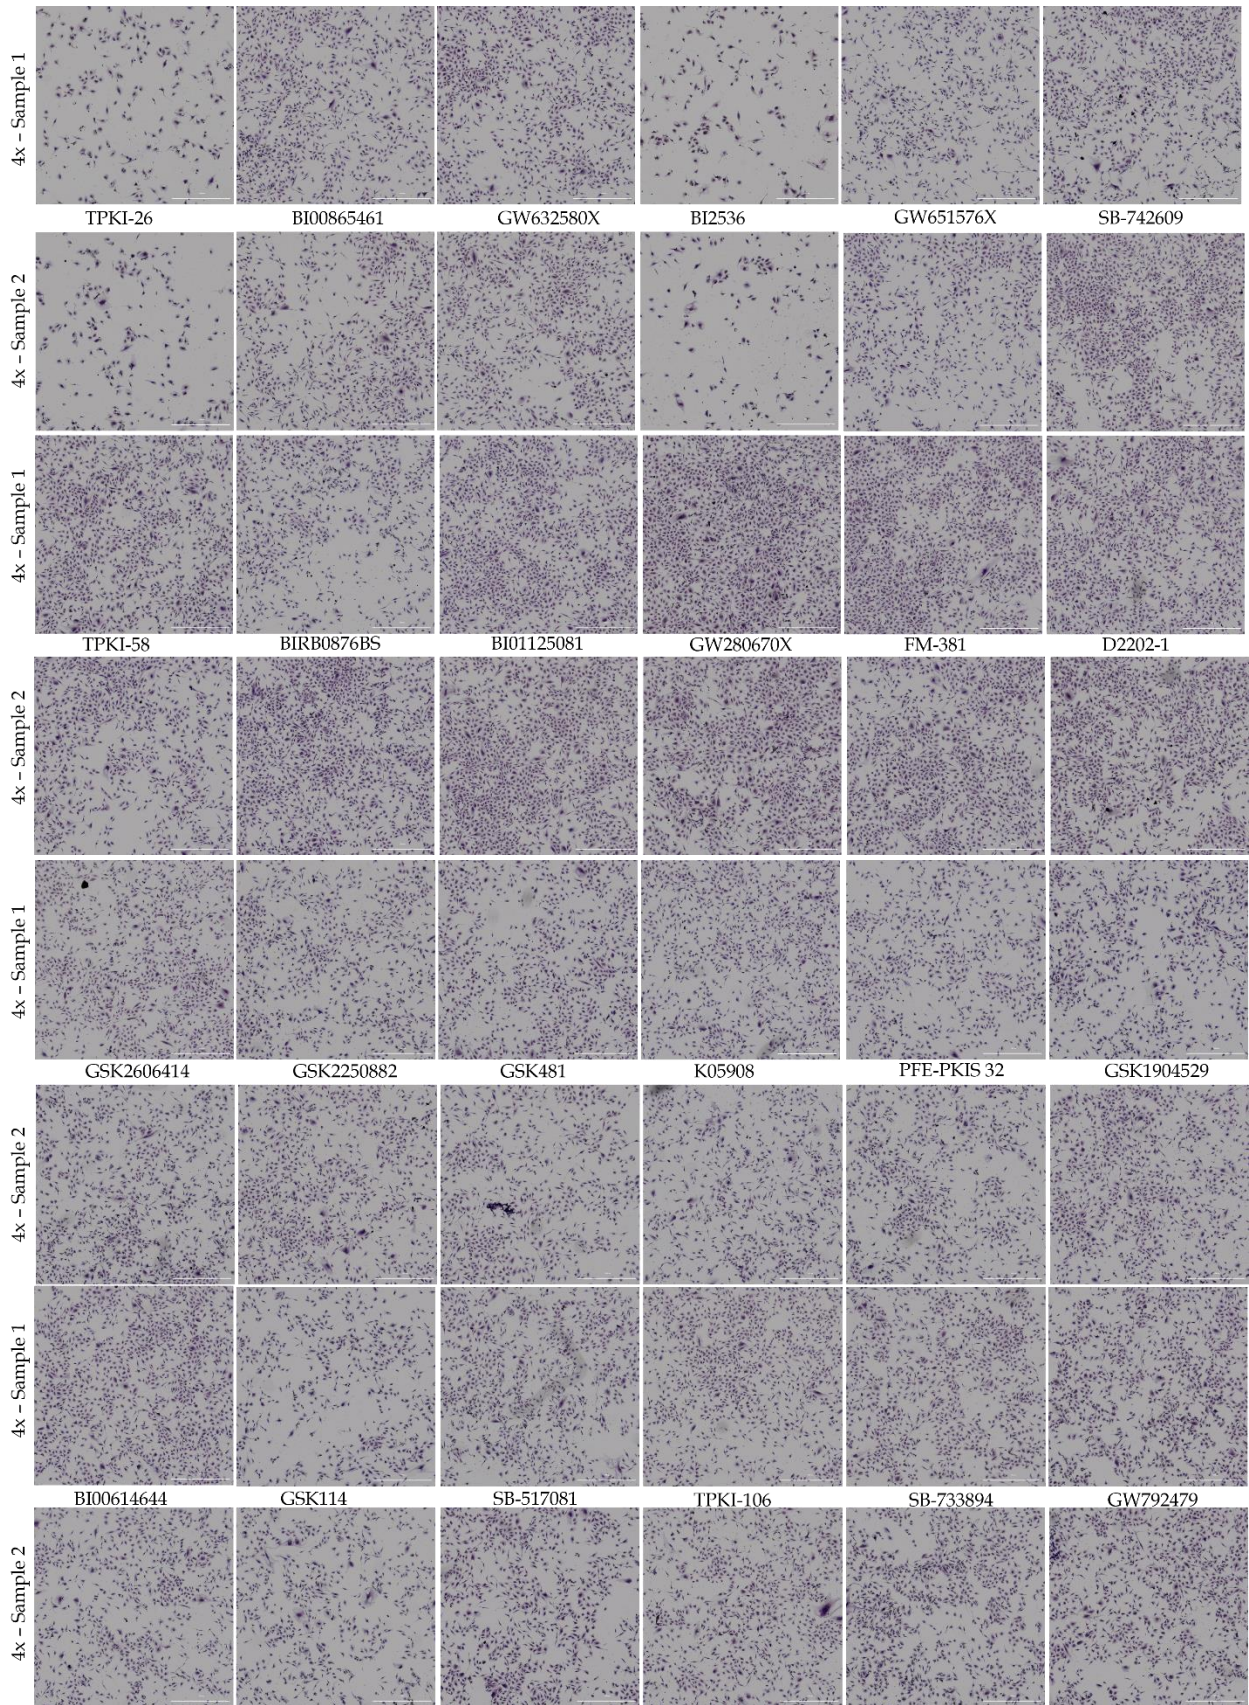

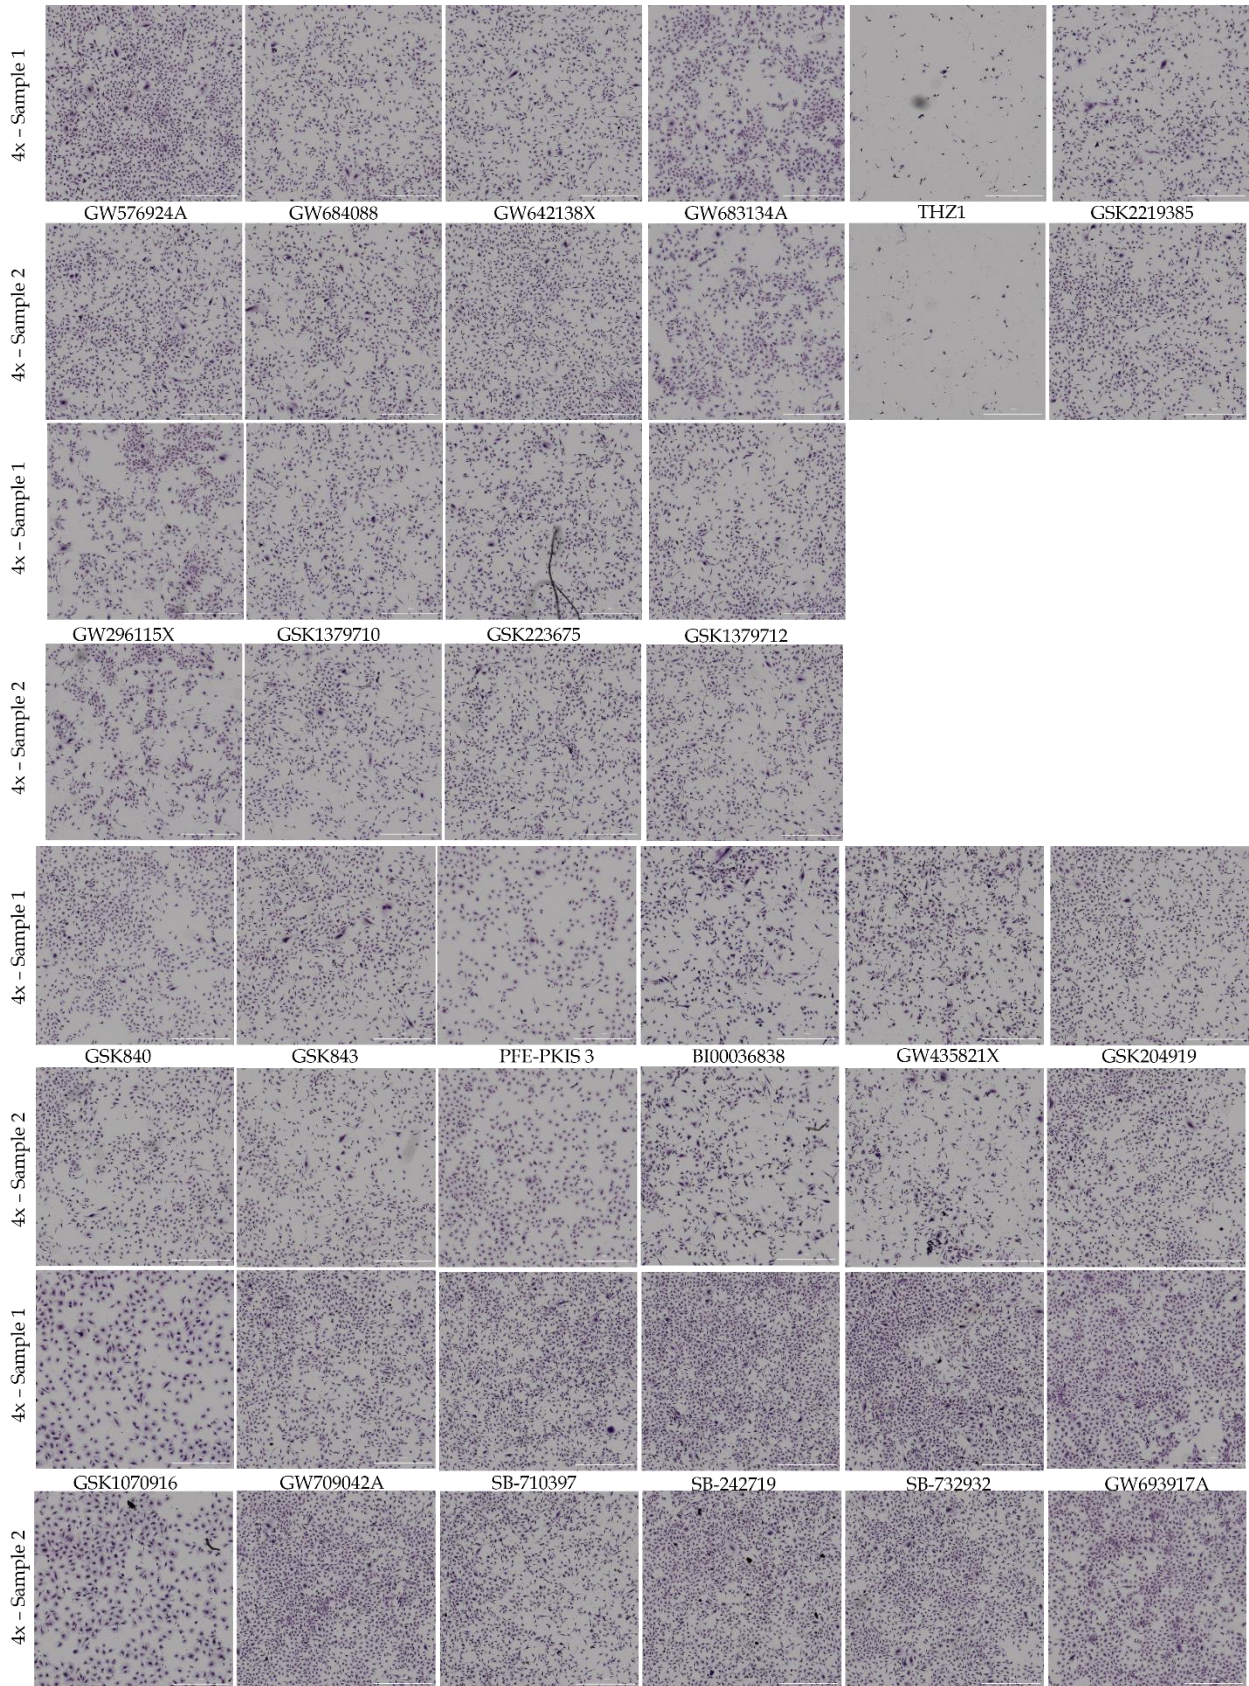



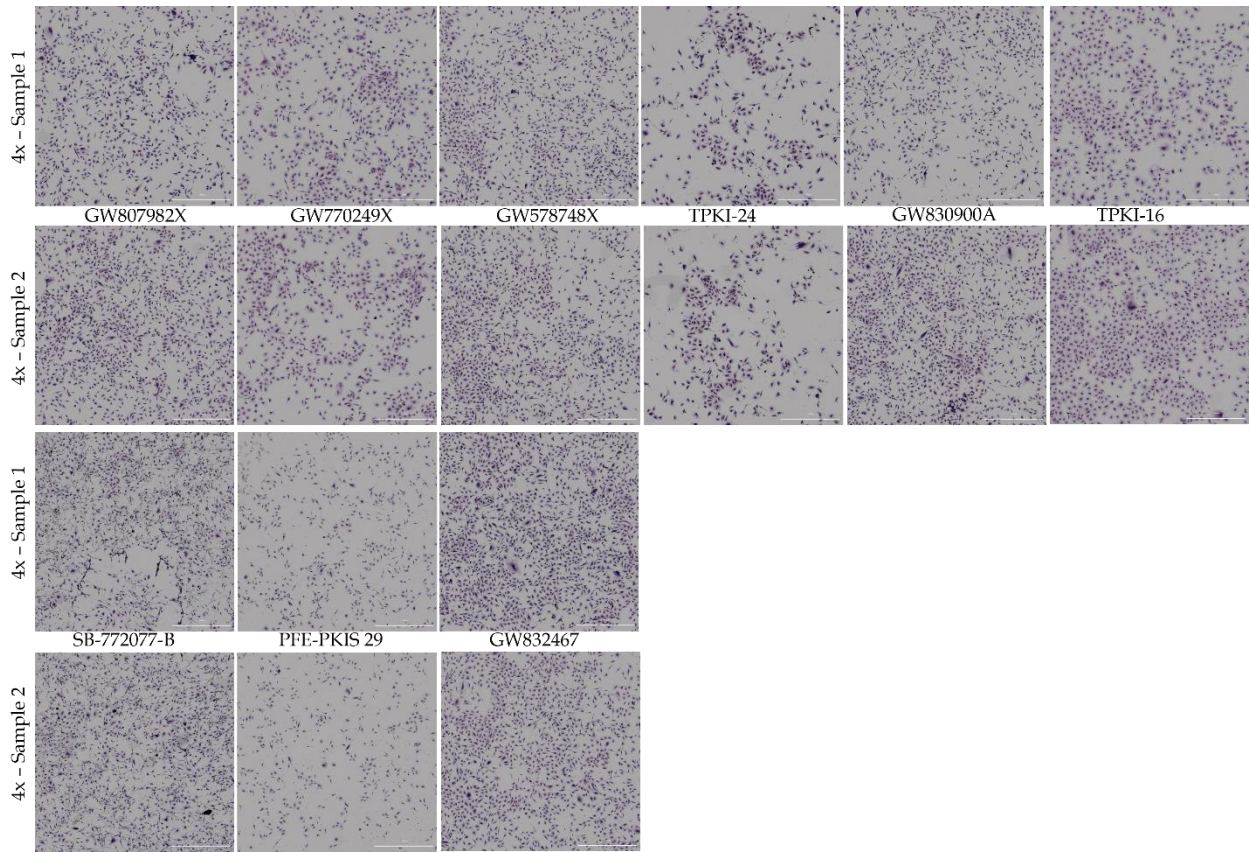

**B**

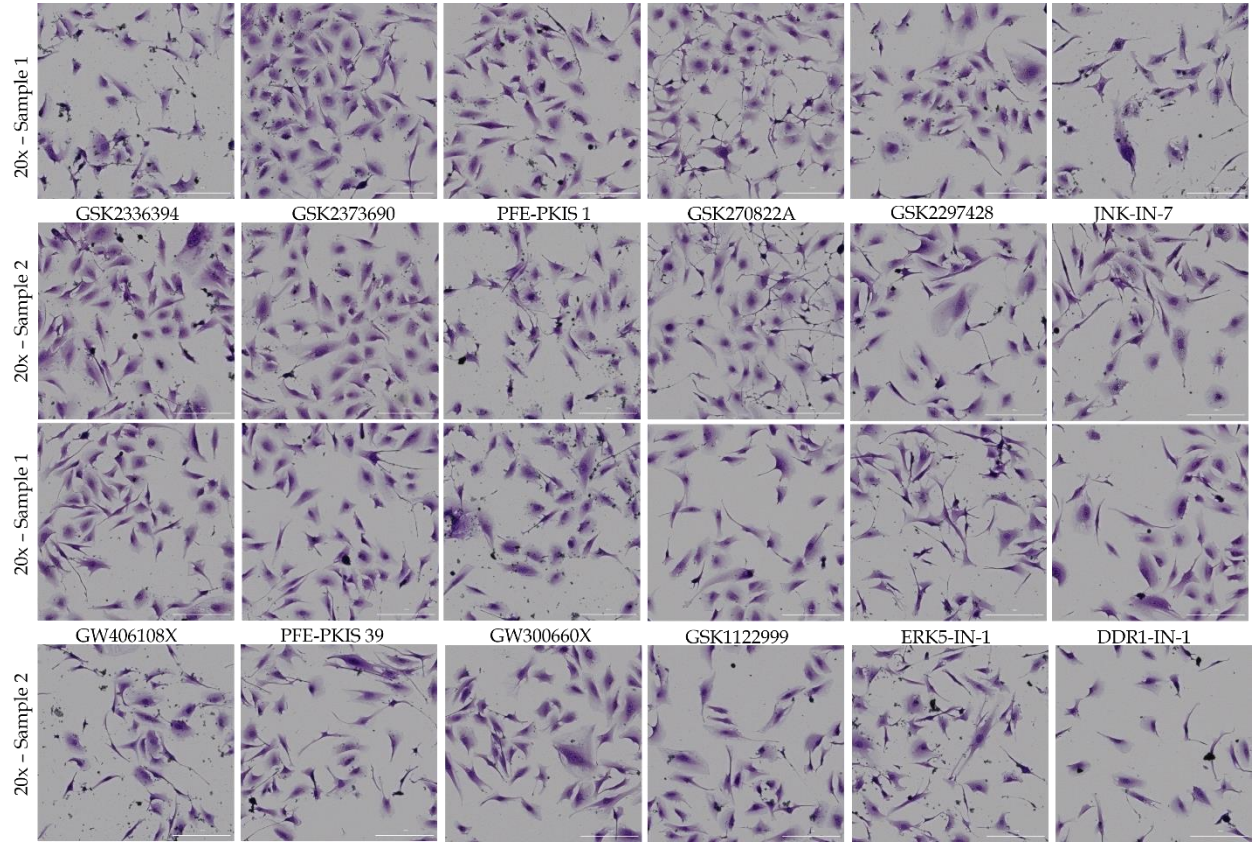

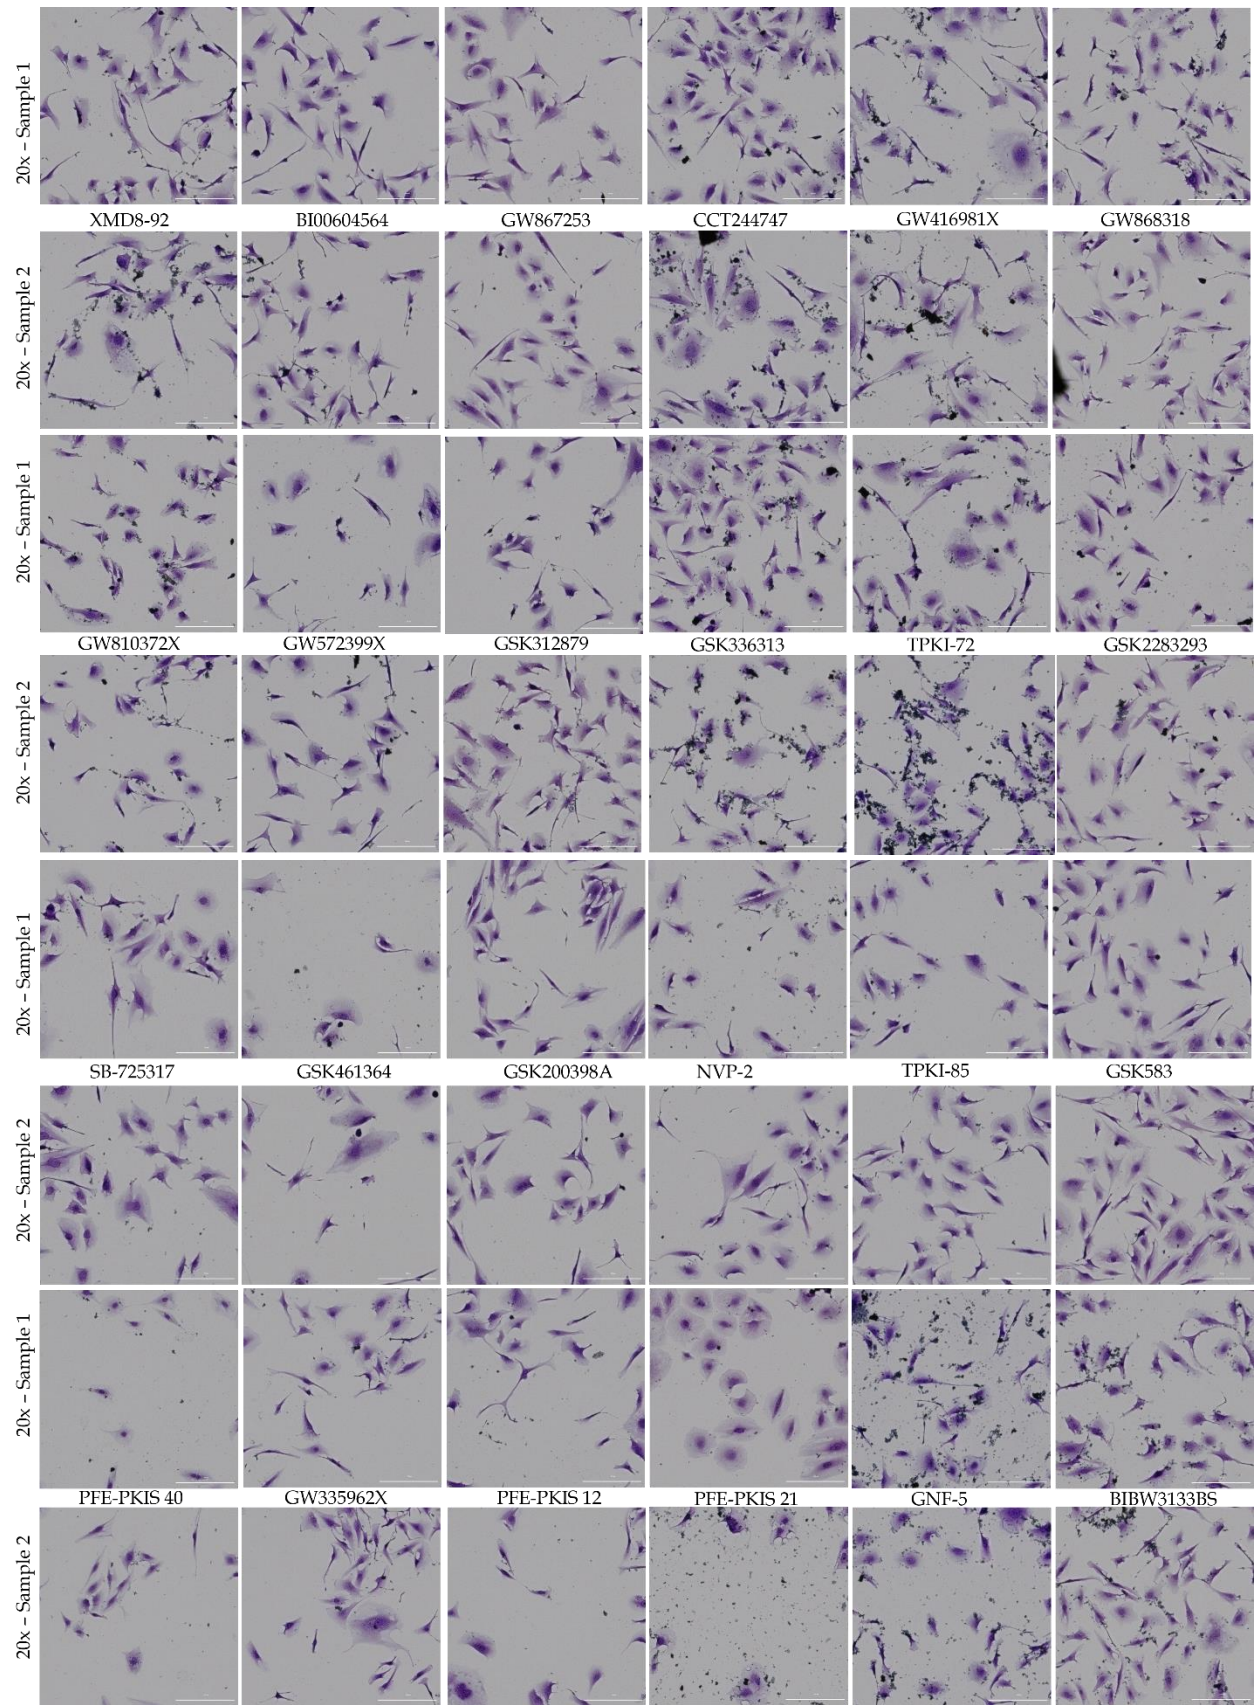

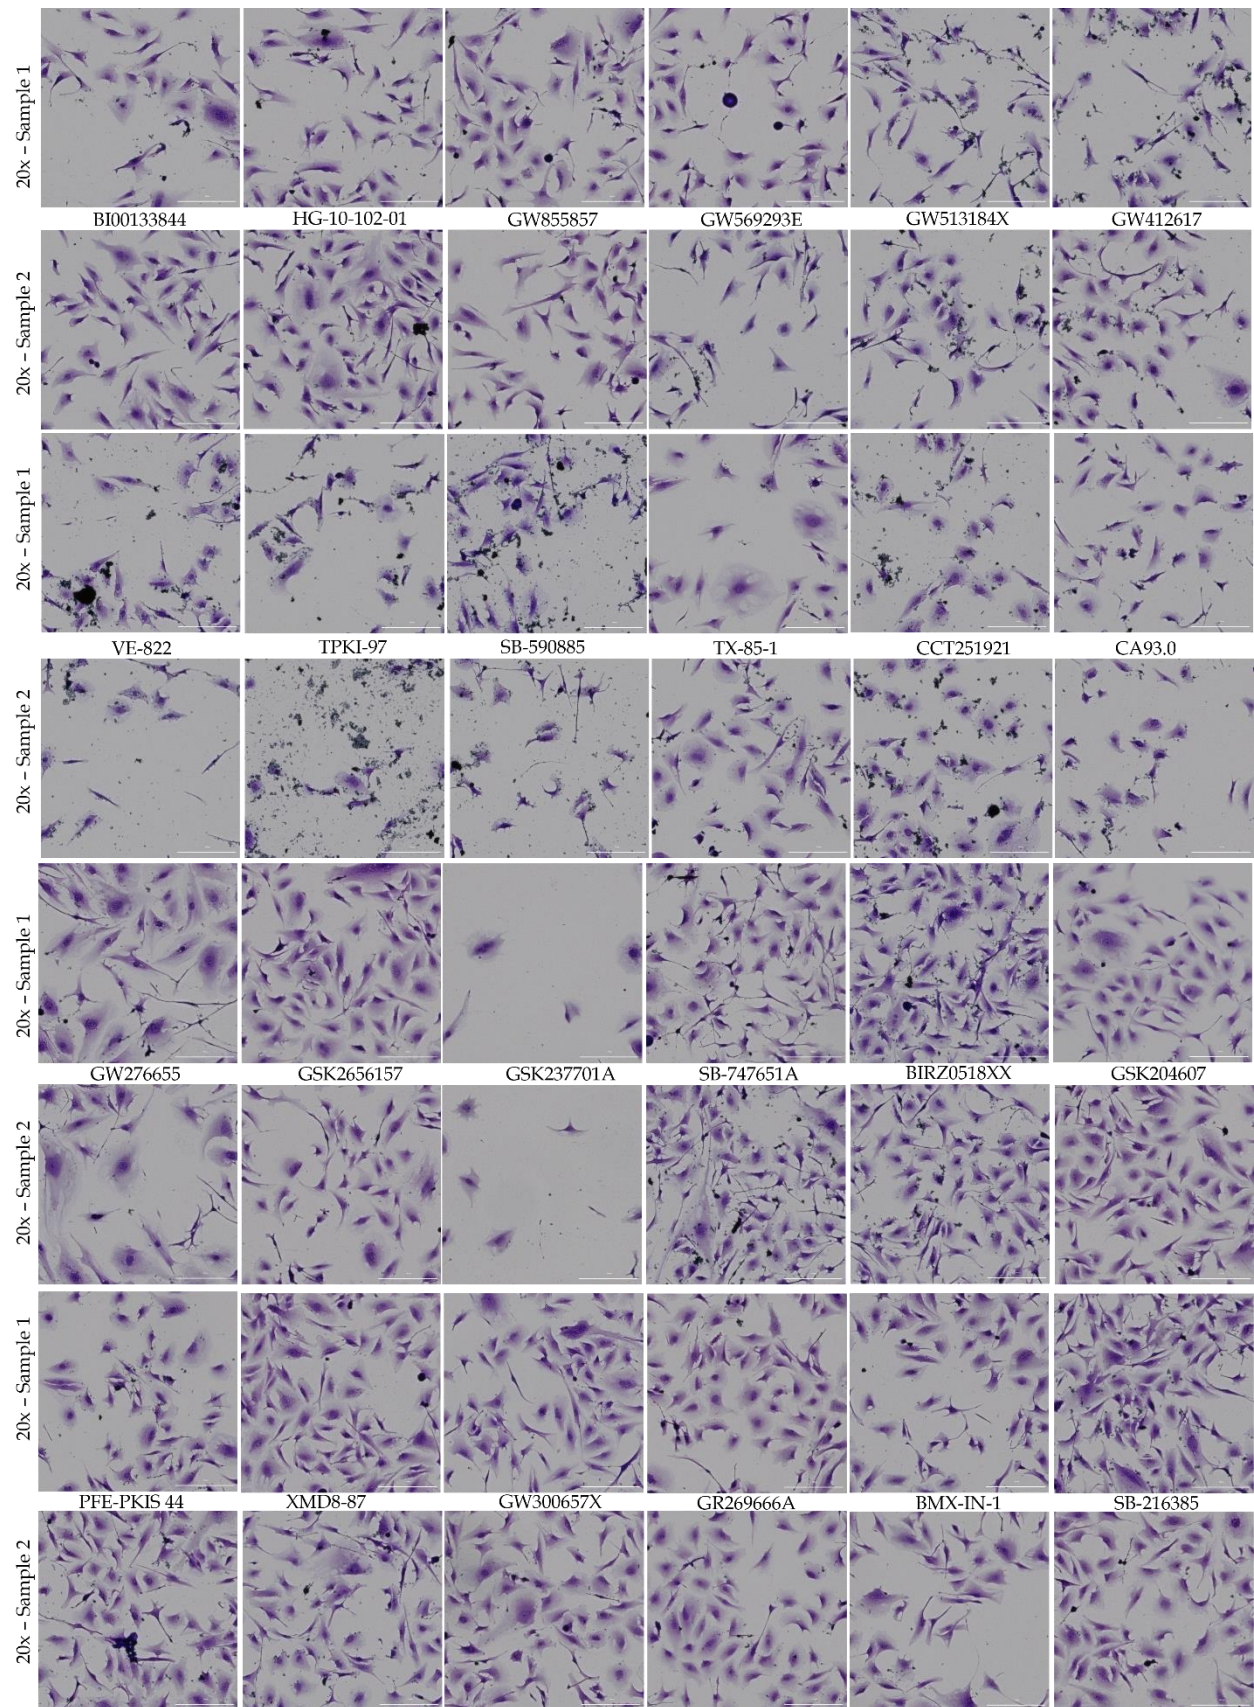

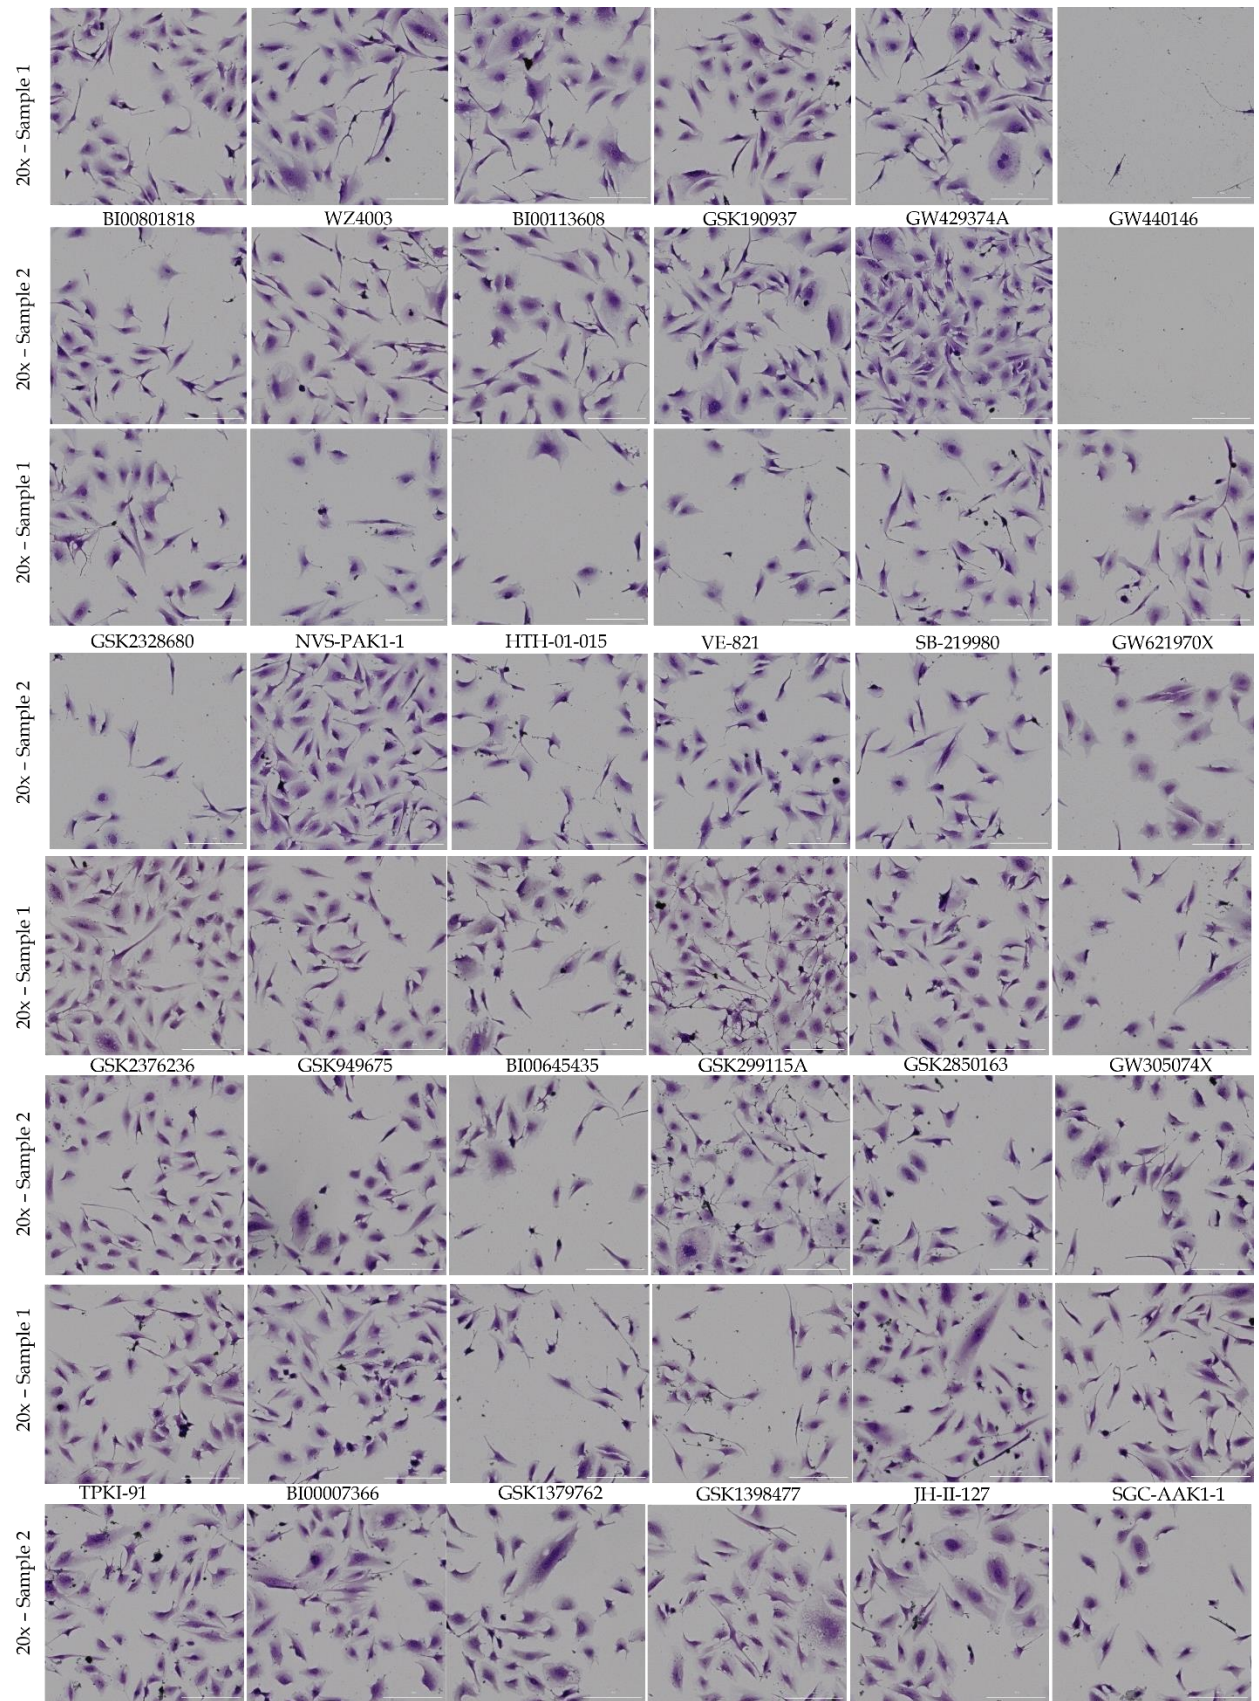

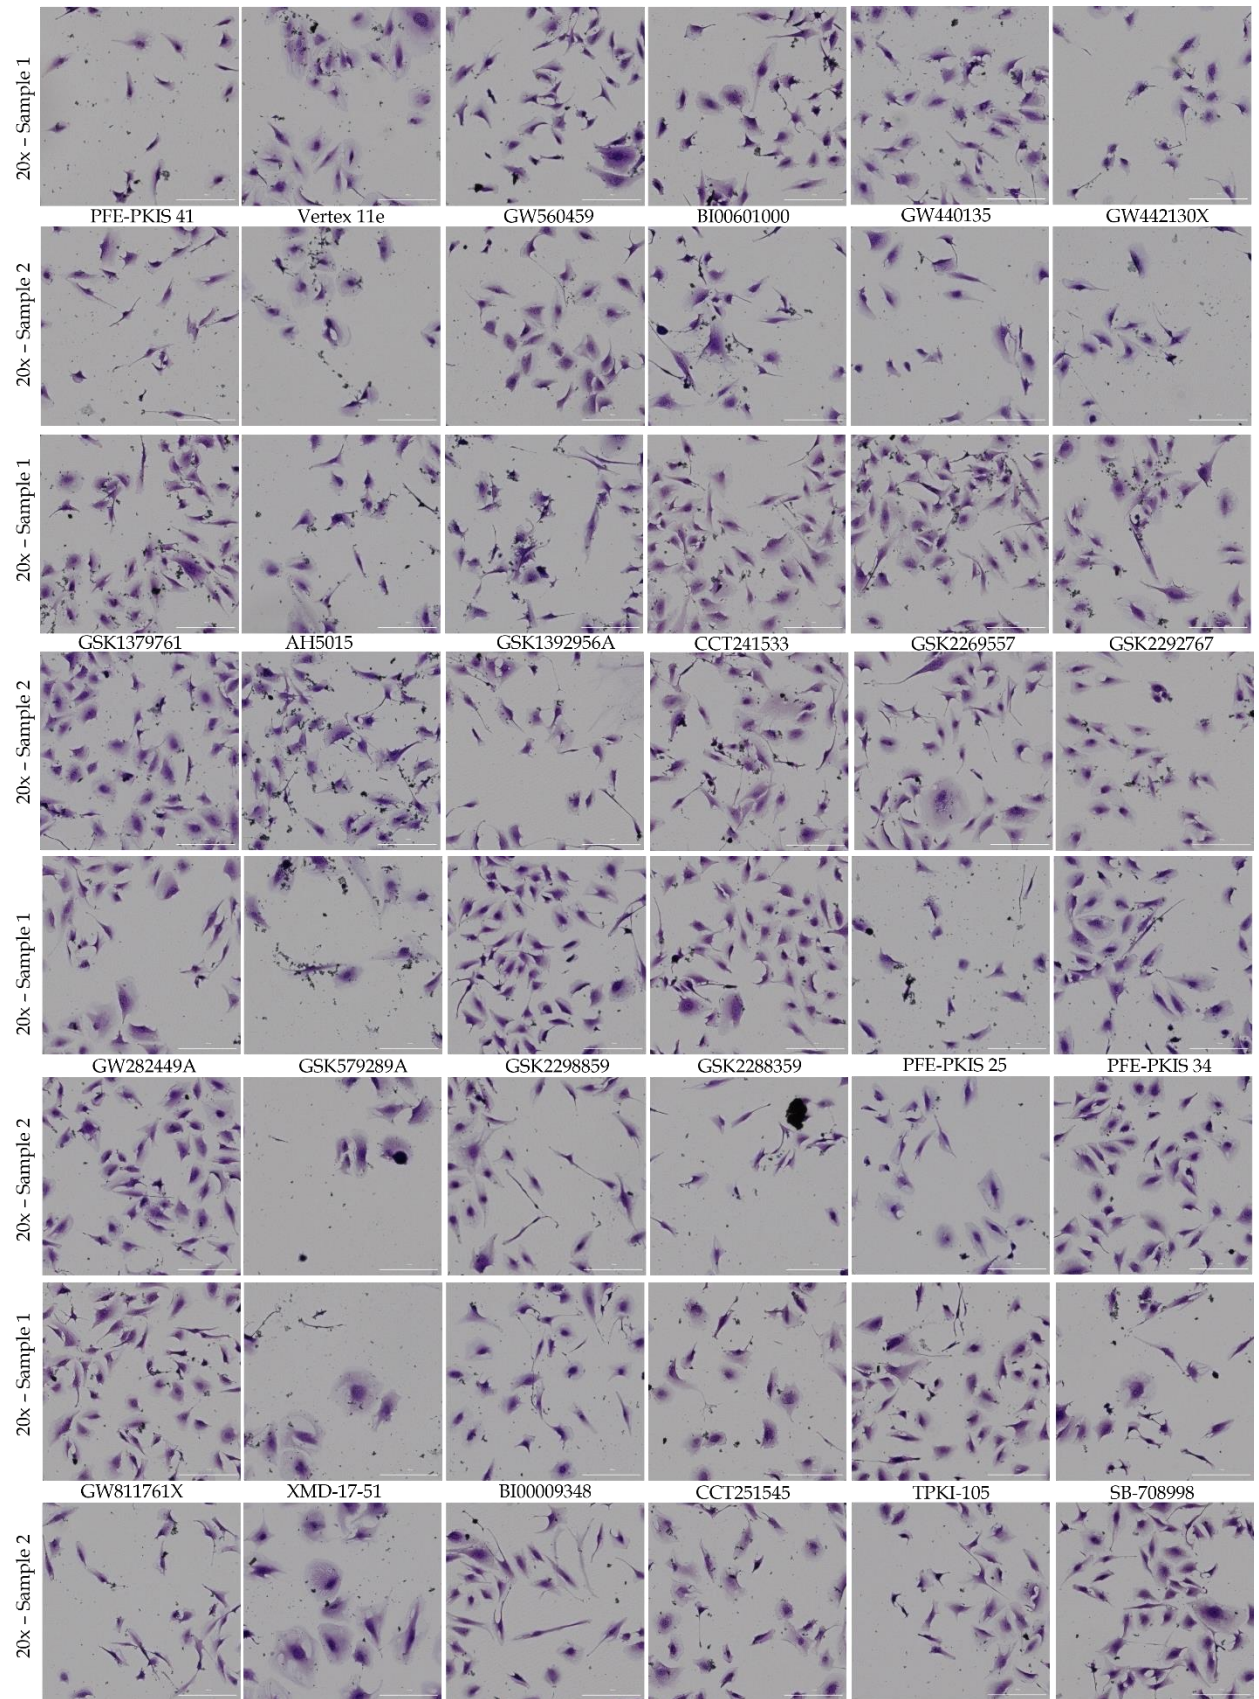

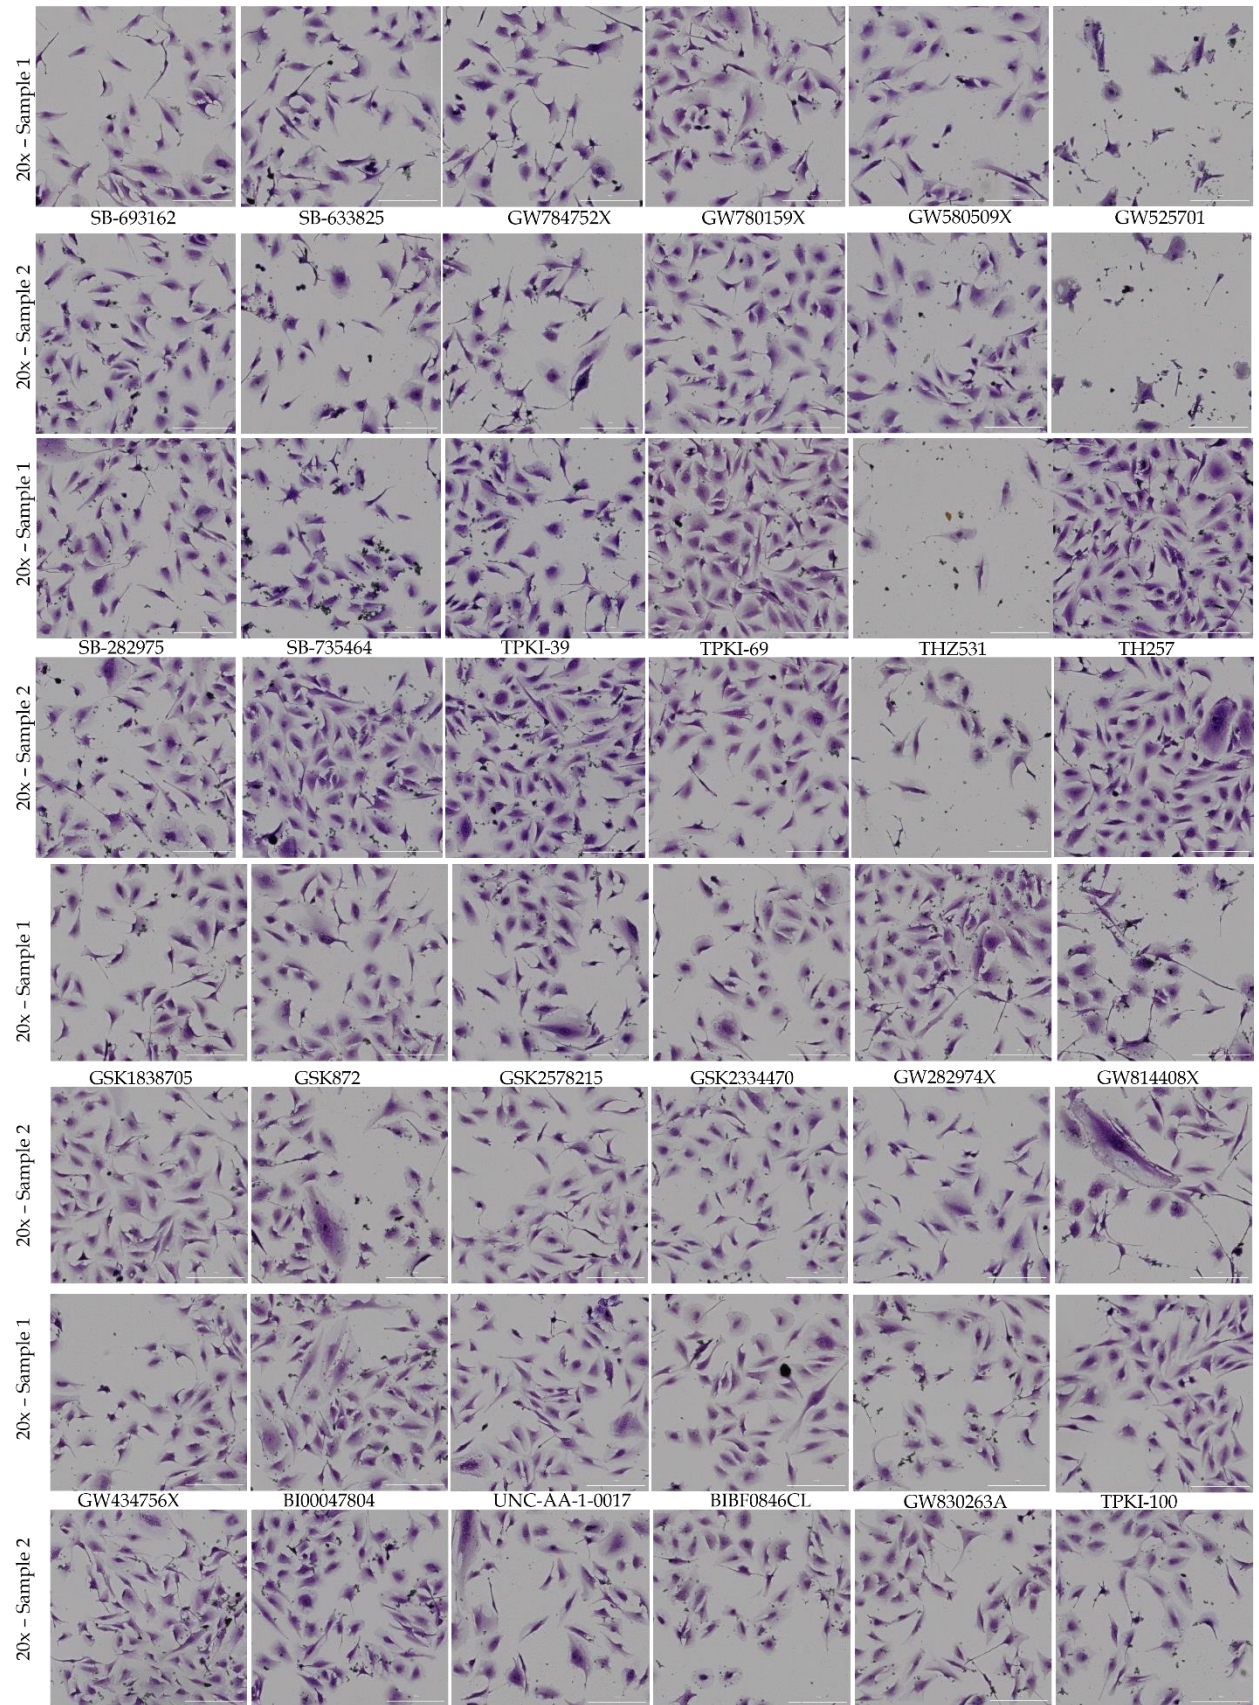

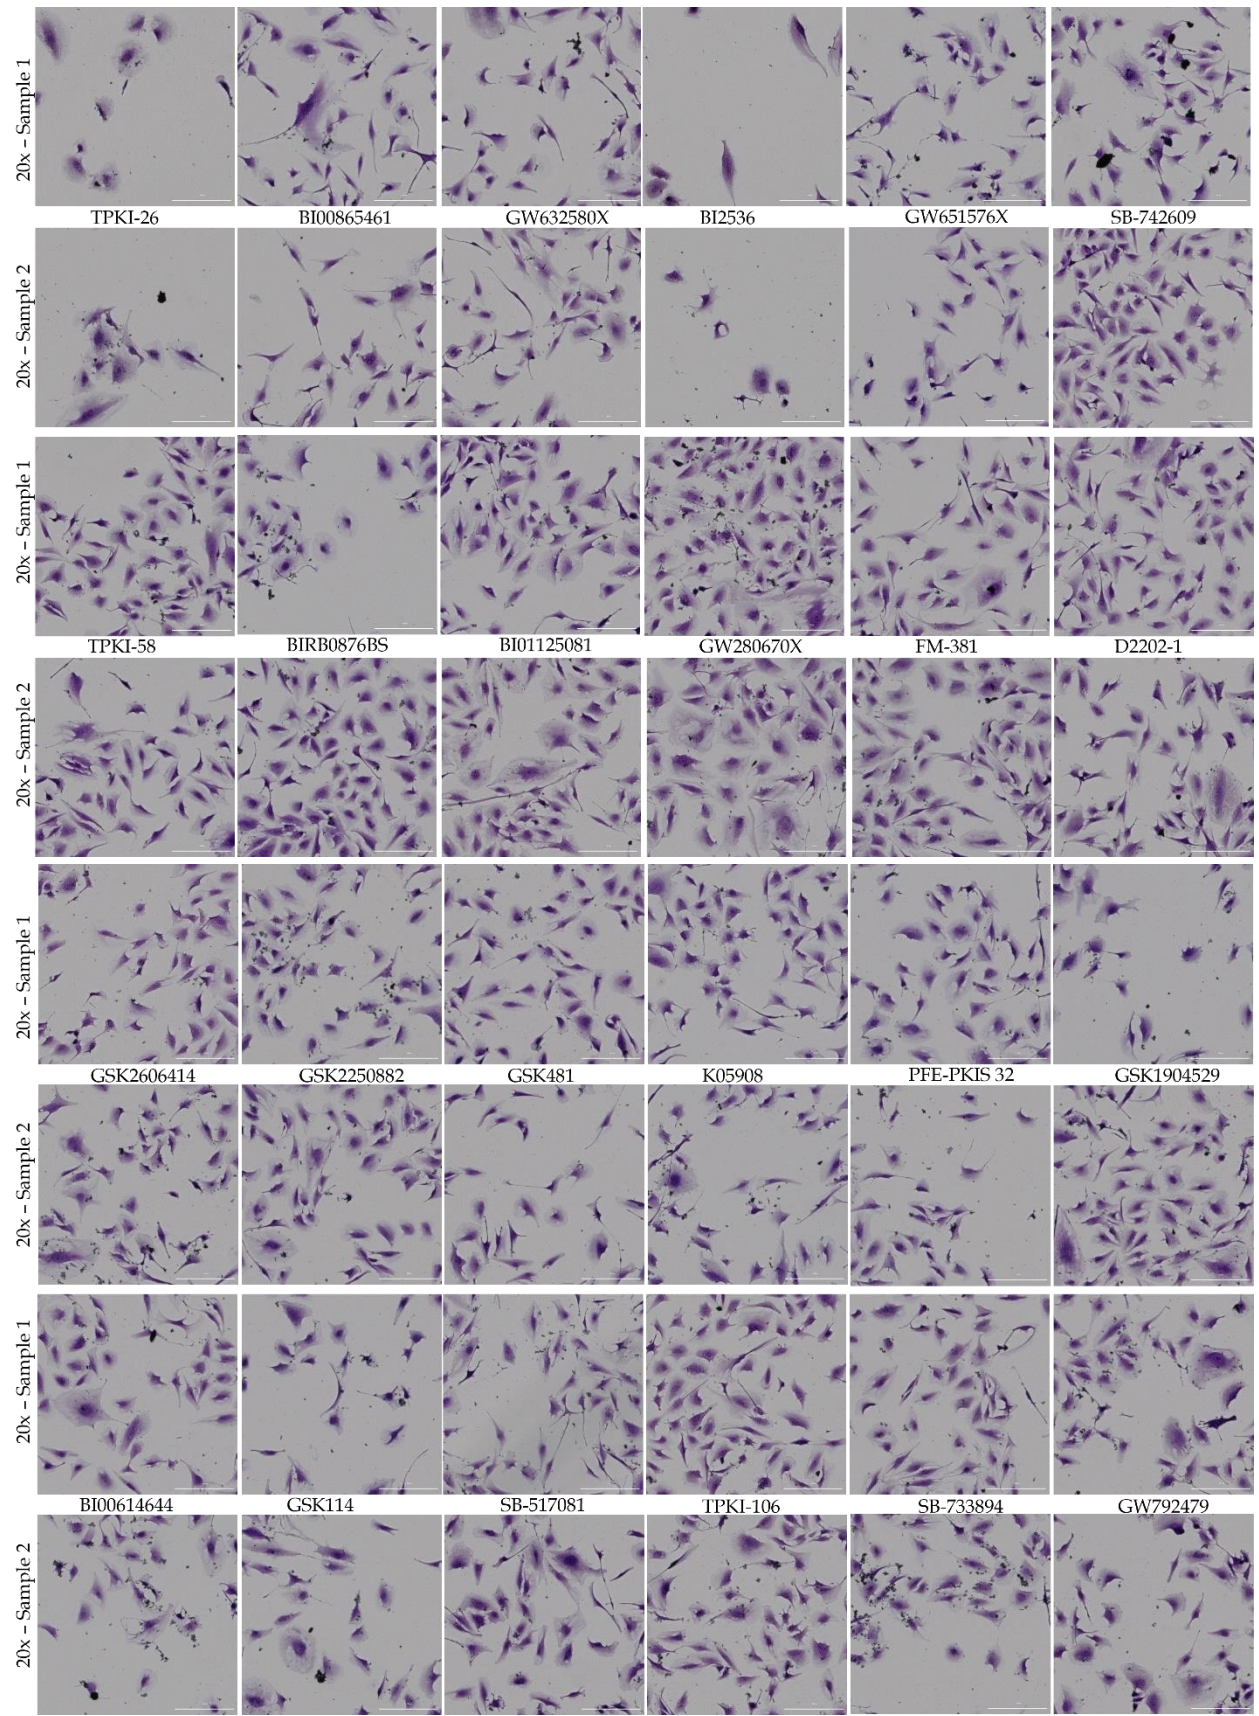



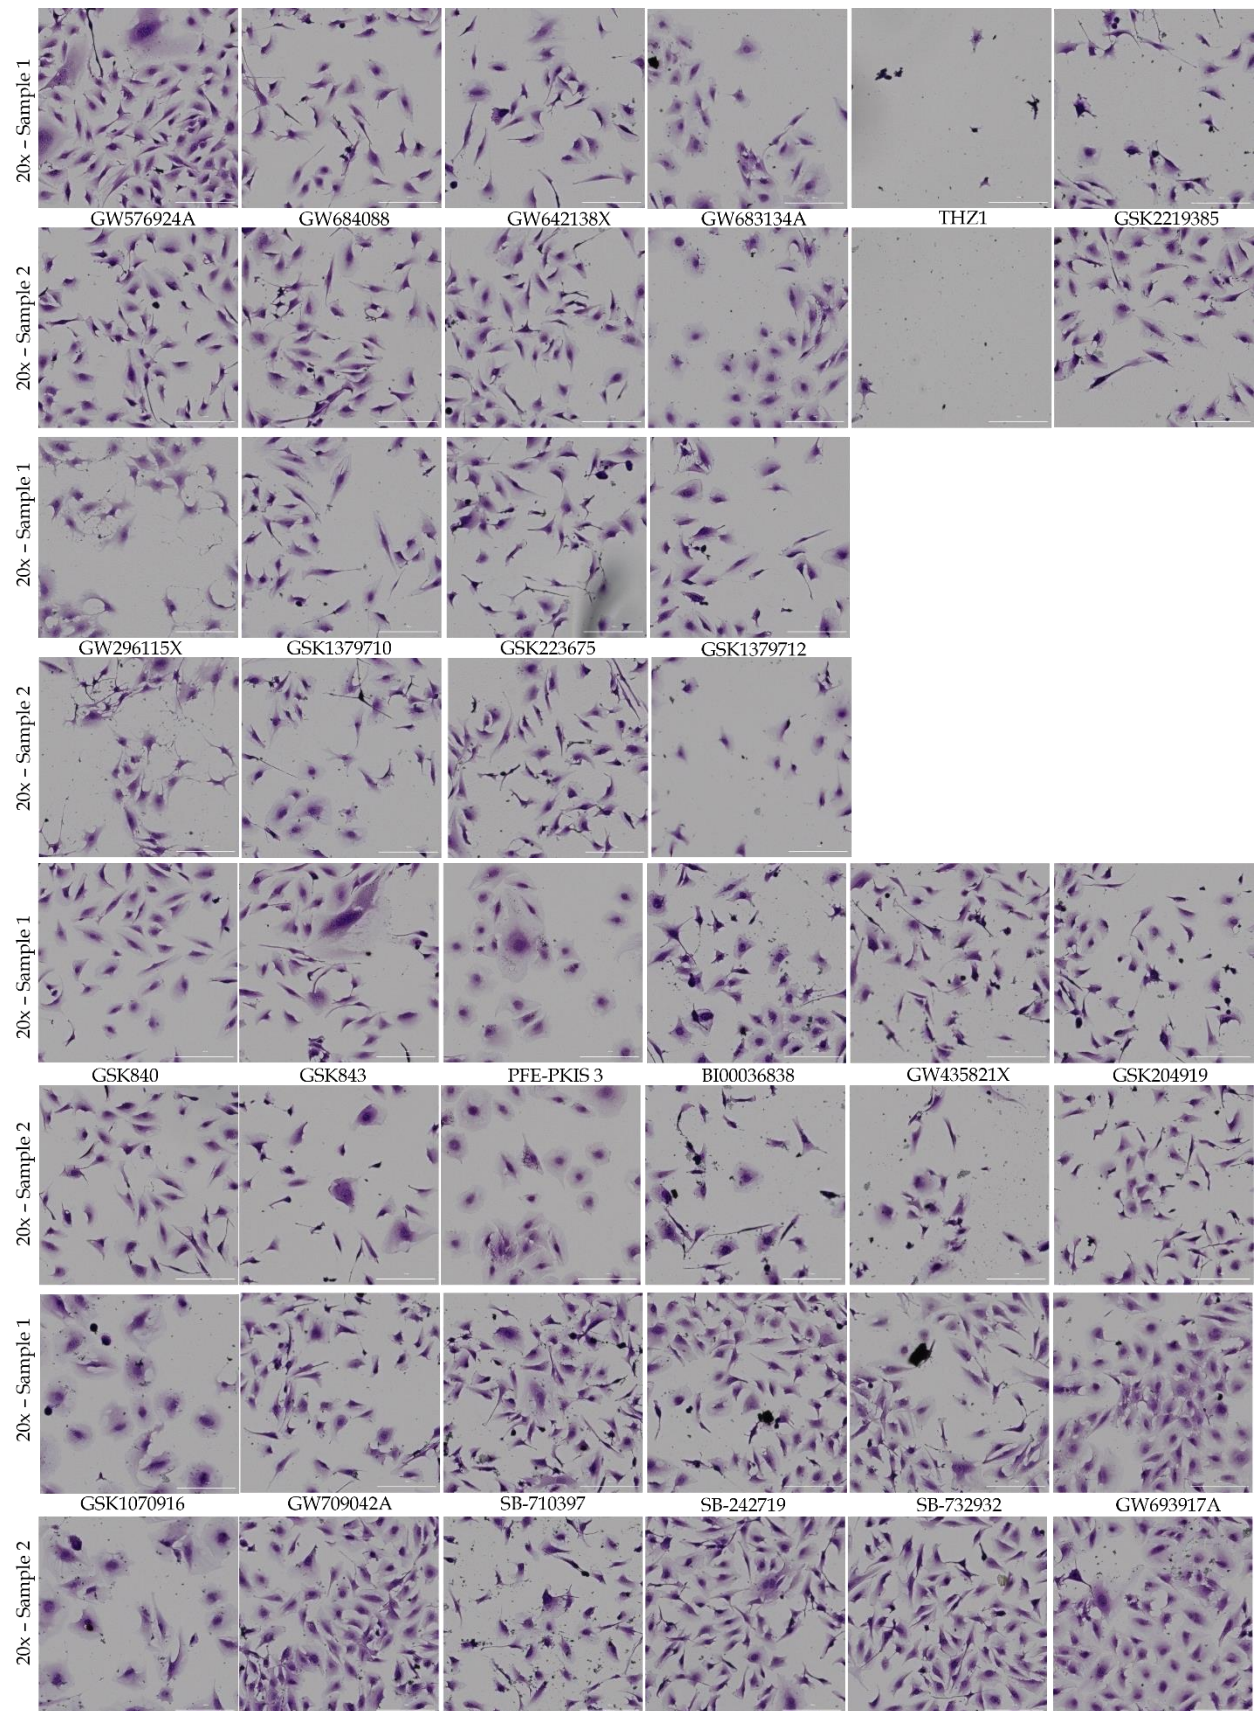

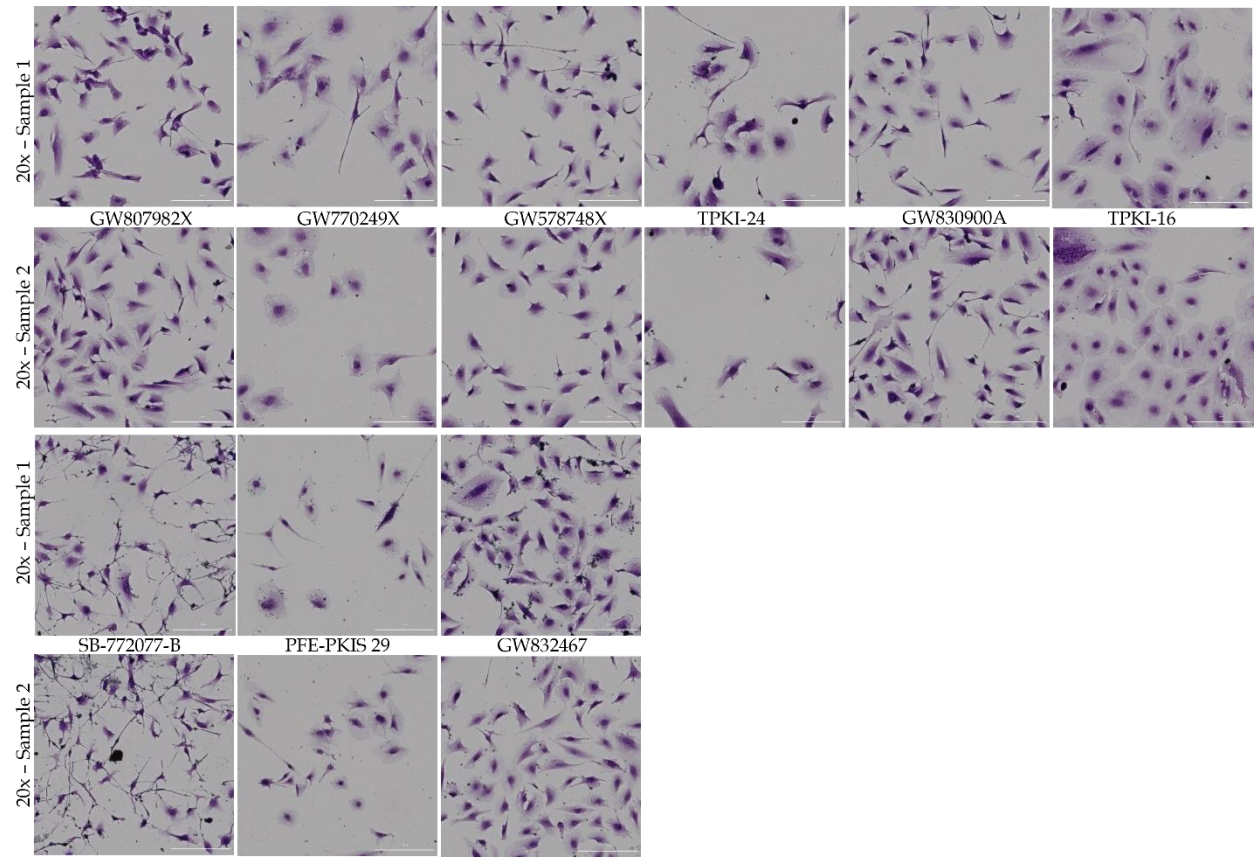

Supplement: acd-36-39-s001.pdf [file acd-36-39-s001.pdf]
