# Supplementary material for: Screening of a kinase inhibitor library identified novel targetable kinase pathways in triple-negative breast cancer
Source: PubMed Central journal article supplement — Anticancer Drugs. 2024 Aug 21;36(1):39–48. doi: 10.1097/CAD.0000000000001658 (PMC11634125; doi:10.1097/cad.0000000000001658), 2024-08-21

Supplemental Digital Content 2: Images (4x and 20x) of crystal violet stained A) MCF7, B) BT20, and C) MDA-MB-231 cells after treatment with 11 other follow-up compounds.

A

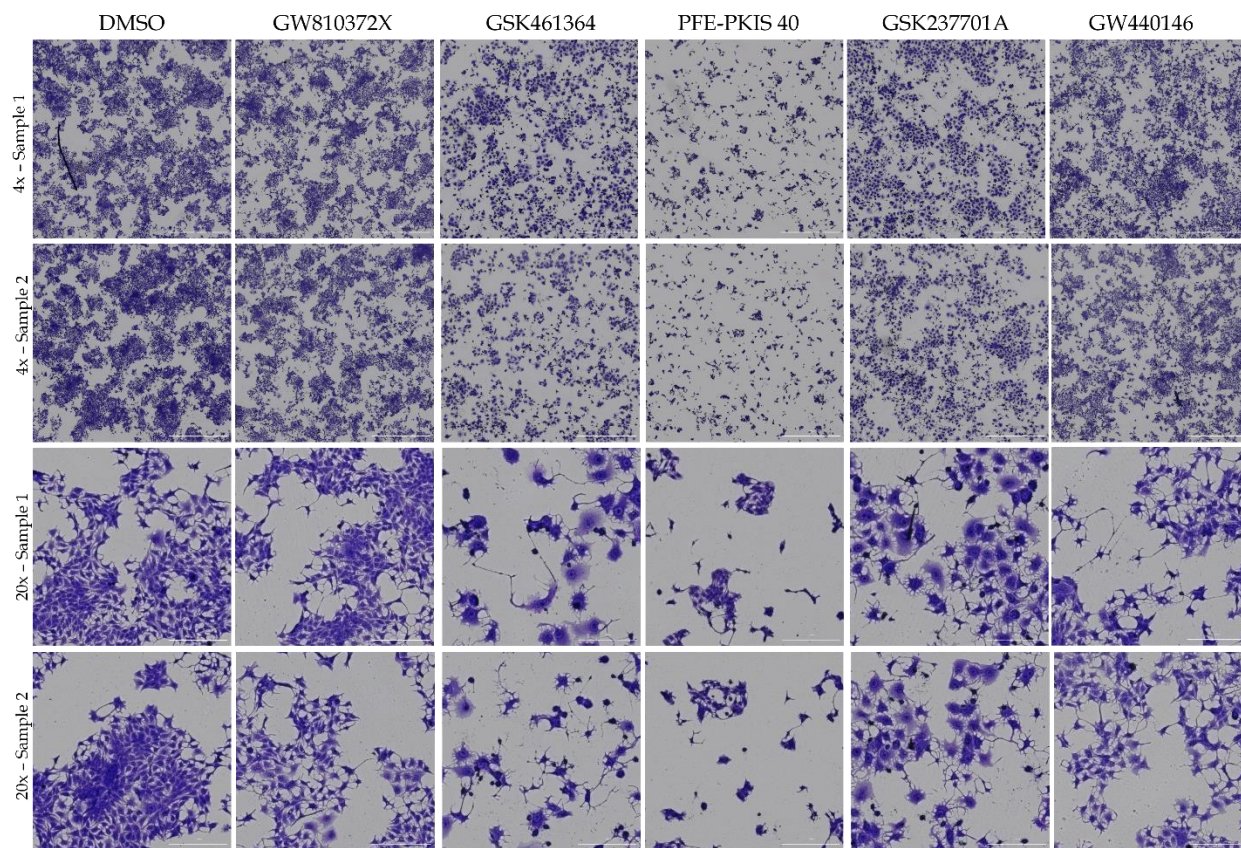

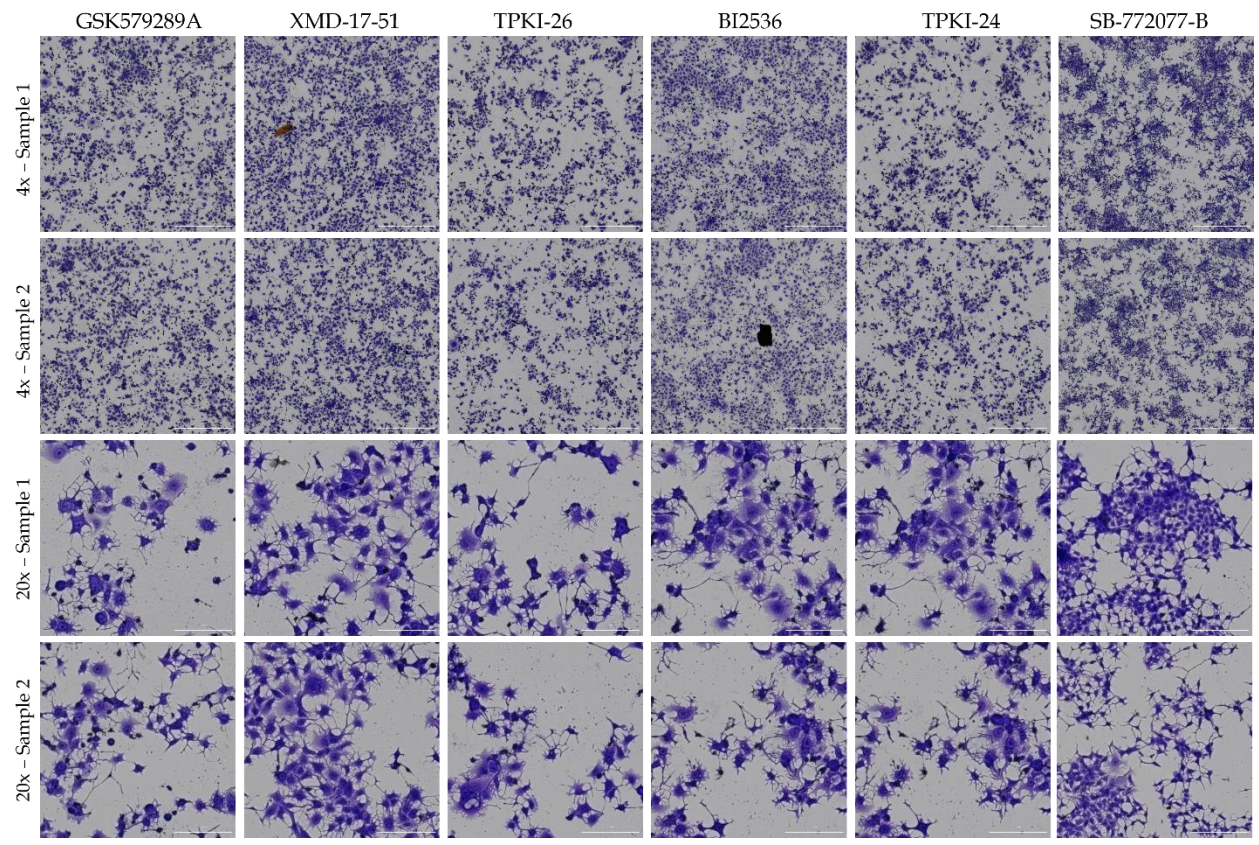

**B**

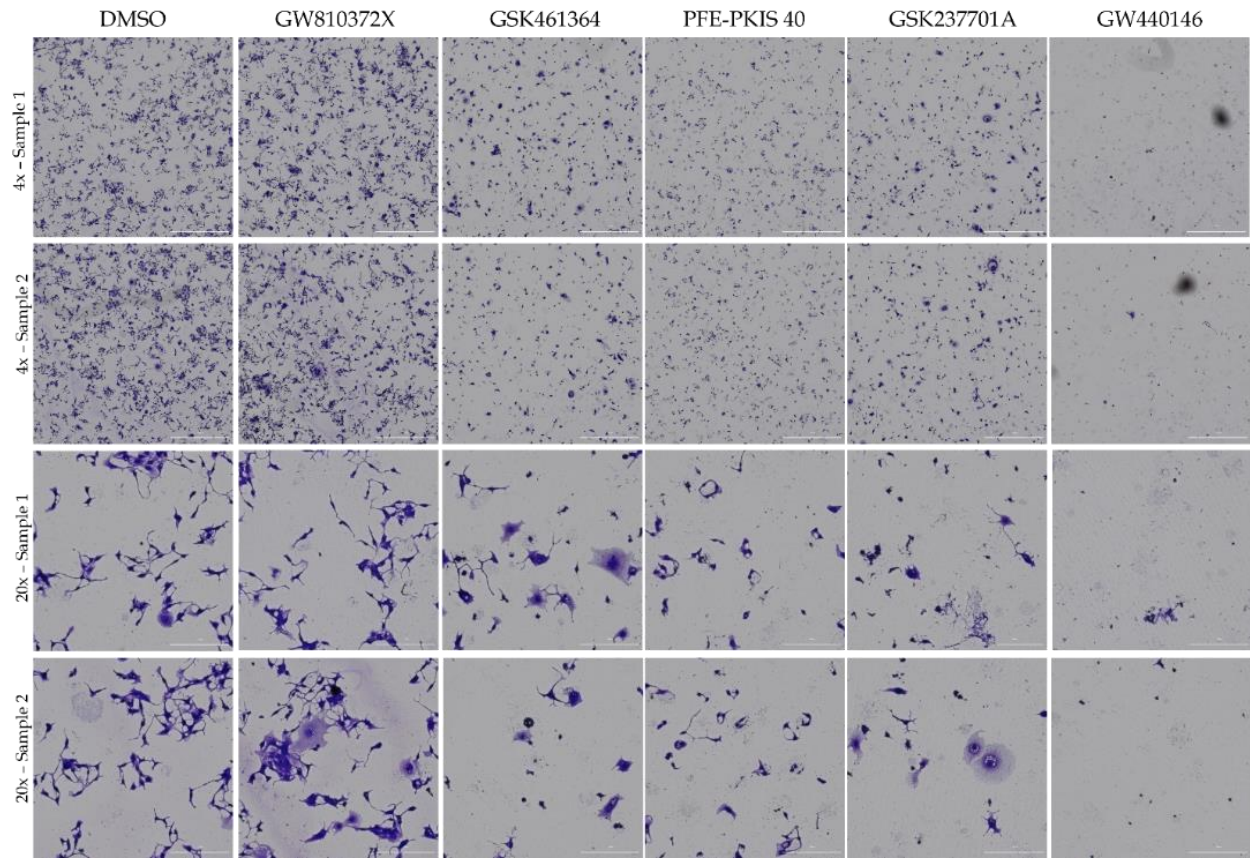

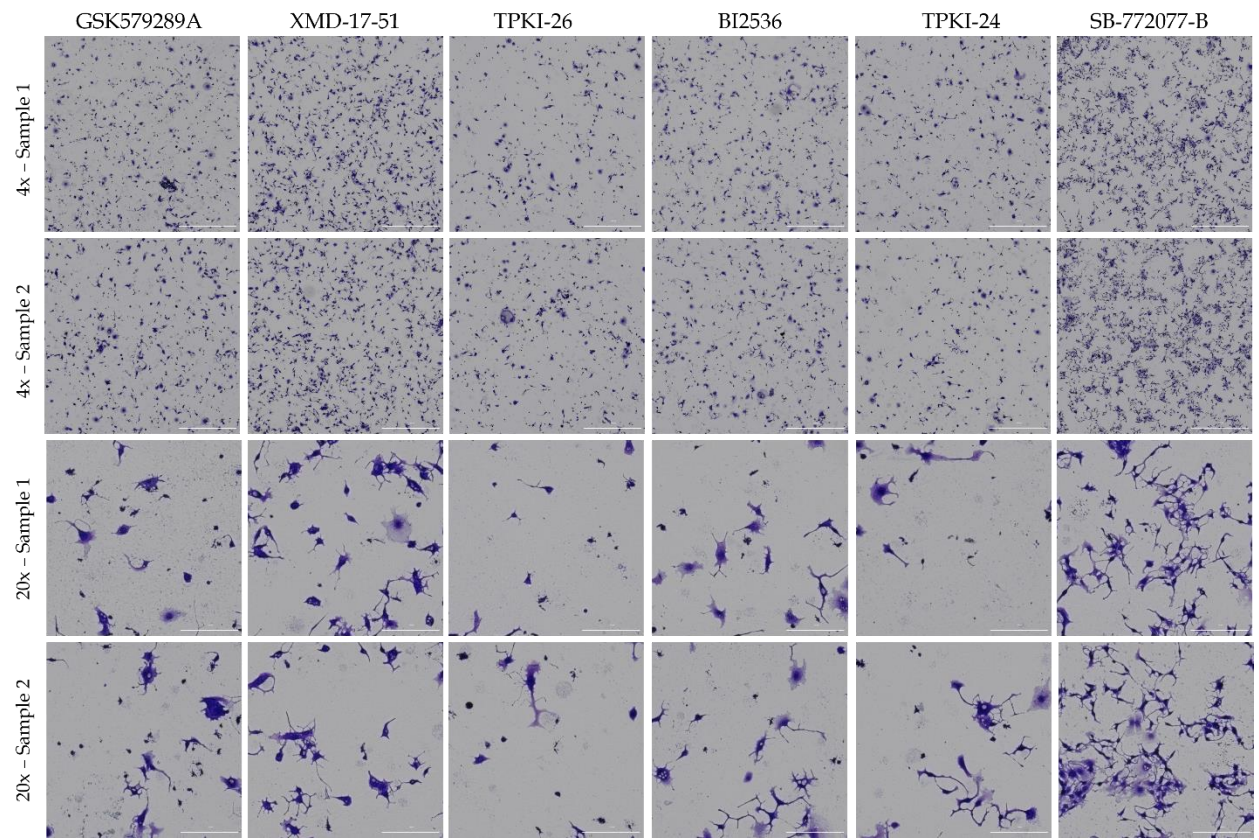

C

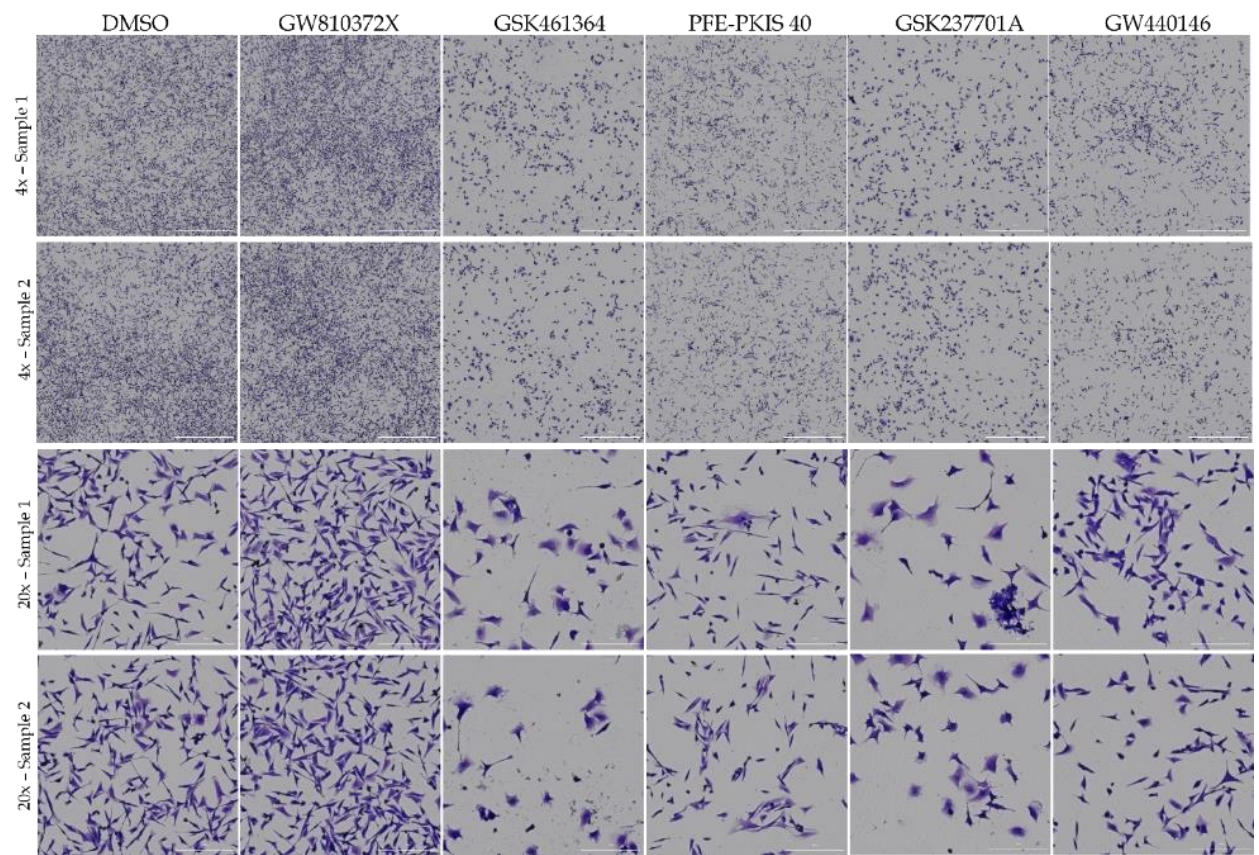

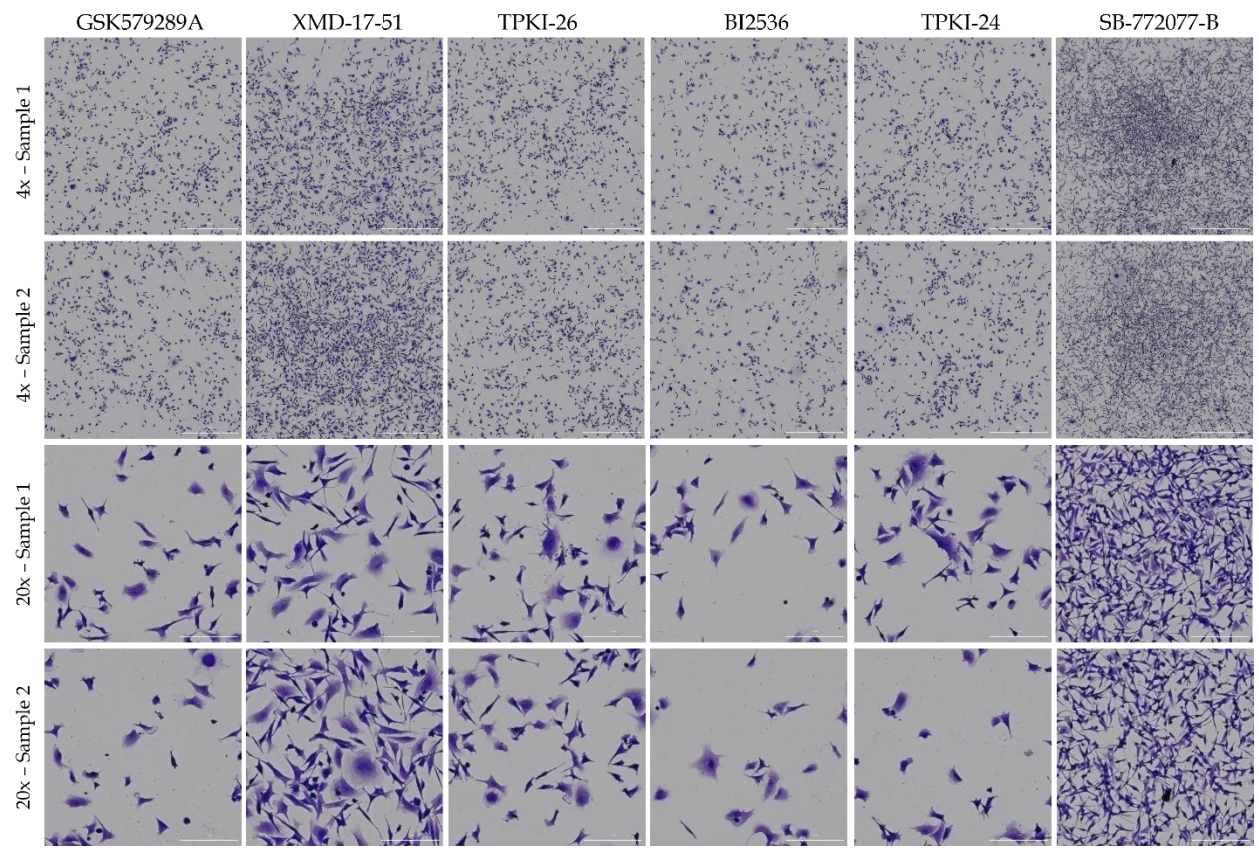

Supplement: acd-36-39-s002.pdf [file acd-36-39-s002.pdf]
